# Supplementary material for: Subset-binding: A novel algorithm to detect paired itemsets from heterogeneous data including biological datasets
Source: Research Square preprint supplement (doi:10.21203/rs.3.rs-405195/v1), 2021-04-12
Supplement: Supplementary file 1 [file 2bfa77a058791ccc37f674d7.csv]

	antecedents	consequences	antecedent support	consequent support	support	confidence	lift	leverage	conviction
0	['column20_Low', 'column60_Low', 'column3_Low']	['column80_Low', 'column115_Low', 'column120_Low']	0.05092841248088	0.053233380927704715	0.029075317859318443	0.5709056387774537	10.72457974354081	0.026364226277680487	2.2064298779756335
1	['column20_Low', 'column60_Low', 'column3_Low']	['column190_High', 'column80_Low', 'column120_Low']	0.05092841248088	0.05281055501934409	0.033228122534360575	0.6524476400444521	12.354493146407298	0.030538564804991213	2.725314381700075
2	['column20_Low', 'column60_Low', 'column3_Low']	['column40_Low', 'column33_High', 'column80_Low']	0.05092841248088	0.05239198436626076	0.028031182315166773	0.5504036145970678	10.505492801137631	0.02536294172467003	2.1076860188377284
3	['column20_Low', 'column60_Low', 'column3_Low']	['column80_Low', 'column33_High', 'column120_Low']	0.05092841248088	0.05315172626500421	0.028031182315166773	0.5504036145970678	10.355329041485163	0.025324249275871815	2.1059961878617464
4	['column20_Low', 'column60_Low', 'column3_Low']	['column40_Low', 'column115_Low', 'column80_Low']	0.05092841248088	0.05017137635692629	0.029075317859318443	0.5709056387774537	11.37911056527431	0.02652016930947943	2.2135658481665597
5	['column20_Low', 'column60_Low', 'column3_Low']	['column40_Low', 'column115_Low', 'column120_Low']	0.05092841248088	0.055619426650570916	0.029202396995440832	0.5734008890696182	10.30936353716858	0.026369787893030506	2.2137424789512647
6	['column20_Low', 'column60_Low', 'column3_Low']	['column40_Low', 'column190_High', 'column120_Low']	0.05092841248088	0.05031663070592142	0.03335520167048297	0.6549428903366167	13.016429779737635	0.03079265554724369	2.7522498238640316
7	['column20_Low', 'column60_Low', 'column3_Low']	['column40_Low', 'column80_Low', 'column33_High', 'column120_Low']	0.05092841248088	0.052030231305412365	0.028031182315166773	0.5504036145970678	10.578534839990475	0.025381365233769135	2.108490636206981
8	['column8_High', 'column125_Low', 'column100_High']	['column140_High', 'column50_High', 'column100_High']	0.051348803350506594	0.05105107870835333	0.02860777079352407	0.5571263384318348	10.913115893487946	0.0259863589920976	2.1427079631051584
9	['column60_Low', 'column40_Low', 'column16_Low']	['column119_Low', 'column80_Low', 'column120_Low']	0.05254895489597078	0.05784592542179267	0.030541784553354025	0.5812063173057669	10.047489310056145	0.027502041627448553	2.2496854979211487
10	['column60_Low', 'column40_Low', 'column16_Low']	['column40_Low', 'column119_Low', 'column80_Low']	0.05254895489597078	0.05266483121070378	0.030541784553354025	0.5812063173057669	11.035947594333892	0.027774302713458838	2.2620569696629316
11	['column60_Low', 'column40_Low', 'column16_Low']	['column40_Low', 'column119_Low', 'column120_Low']	0.05254895489597078	0.057832706173088874	0.030541784553354025	0.5812063173057669	10.049785938881378	0.027502736285152447	2.249717062983493
12	['column60_Low', 'column40_Low', 'column16_Low']	['column119_Low', 'column40_Low', 'column80_Low', 'column120_Low']	0.05254895489597078	0.050878617636053385	0.030541784553354025	0.5812063173057669	11.423390498996477	0.027868166370027713	2.266322109392736
13	['column20_Low', 'column40_Low', 'column36_Low']	['column119_Low', 'column120_Low', 'column80_Low']	0.05160407721116209	0.05784592542179267	0.032433325840293764	0.6285031647320757	10.86512420968713	0.02944824023847645	2.5361025589860646
14	['column20_Low', 'column40_Low', 'column36_Low']	['column190_High', 'column120_Low', 'column80_Low']	0.05160407721116209	0.05281055501934409	0.028095306134670796	0.5444396577368447	10.309296267335586	0.025370066175888238	2.079174495907965
15	['column20_Low', 'column40_Low', 'column36_Low']	['column119_Low', 'column40_Low', 'column80_Low']	0.05160407721116209	0.05266483121070378	0.032433325840293764	0.6285031647320757	11.93402029938219	0.029715605824183786	2.550049095589404
16	['column20_Low', 'column40_Low', 'column36_Low']	['column119_Low', 'column120_Low', 'column40_Low']	0.05160407721116209	0.057832706173088874	0.032433325840293764	0.6285031647320757	10.867607731359028	0.029448922405607234	2.5361381427311973
17	['column20_Low', 'column40_Low', 'column36_Low']	['column120_Low', 'column40_Low', 'column132_High']	0.05160407721116209	0.05180347876603563	0.027895369169613486	0.5405652164937783	10.434921155298818	0.025222098451564187	2.0638326815347097
18	['column20_Low', 'column40_Low', 'column36_Low']	['column188_High', 'column120_Low', 'column40_Low']	0.05160407721116209	0.05085931251832429	0.026492494687965006	0.5133798746087181	10.094117462239597	0.023867946797862777	1.9504756132280594
19	['column20_Low', 'column40_Low', 'column36_Low']	['column190_High', 'column120_Low', 'column40_Low']	0.05160407721116209	0.05031663070592142	0.028095306134670796	0.5444396577368447	10.820272544059142	0.025498762838716896	2.0846489063911804
20	['column20_Low', 'column40_Low', 'column36_Low']	['column119_Low', 'column120_Low', 'column40_Low', 'column80_Low']	0.05160407721116209	0.050878617636053385	0.032433325840293764	0.6285031647320757	12.352992159258442	0.029807781727405672	2.554857248459299
21	['column20_Low', 'column40_Low', 'column60_Low']	['column40_Low', 'column33_High', 'column80_Low']	0.09184931336206256	0.05239198436626076	0.05076915100600646	0.5527439362108084	10.55016226044614	0.04595698321628949	2.118714741630383
22	['column20_Low', 'column40_Low', 'column60_Low']	['column120_Low', 'column33_High', 'column80_Low']	0.09184931336206256	0.05315172626500421	0.05076915100600646	0.5527439362108084	10.39936000300224	0.04588720144455752	2.1170160684088133
23	['column20_Low', 'column40_Low', 'column60_Low']	['column40_Low', 'column120_Low', 'column33_High', 'column80_Low']	0.09184931336206256	0.052030231305412365	0.05076915100600646	0.5527439362108084	10.6235148747707	0.04599020998653504	2.1195235692576344
24	['column20_Low', 'column40_Low', 'column60_Low']	['column119_Low', 'column120_Low', 'column40_Low', 'column80_Low']	0.09184931336206256	0.050878617636053385	0.04762954305360889	0.5185617759150478	10.192135714543998	0.042956376958926464	1.971429219538807
25	['column135_High', 'column20_Low', 'column40_Low']	['column40_Low', 'column115_Low', 'column80_Low']	0.05577799761503803	0.05017137635692629	0.0288925870042489	0.5179925461587261	10.324463544186104	0.02609412809346909	1.9705683305799135
26	['column40_Low', 'column197_Low', 'column20_Low']	['column120_Low', 'column190_High', 'column80_Low']	0.05596743687781982	0.05281055501934409	0.03200692708638118	0.571884811453027	10.828986956178554	0.029051255681853405	2.2124640057630893
27	['column40_Low', 'column197_Low', 'column20_Low']	['column33_High', 'column40_Low', 'column80_Low']	0.05596743687781982	0.05239198436626076	0.03238472465722467	0.5786351218463409	11.044344451648003	0.029452479579302245	2.2489012842882814
28	['column40_Low', 'column197_Low', 'column20_Low']	['column33_High', 'column120_Low', 'column40_Low']	0.05596743687781982	0.057689762385624184	0.03238472465722467	0.5786351218463409	10.030117960592122	0.029155976522410823	2.236328385373267
29	['column40_Low', 'column197_Low', 'column20_Low']	['column33_High', 'column120_Low', 'column80_Low']	0.05596743687781982	0.05315172626500421	0.03238472465722467	0.5786351218463409	10.886478436492887	0.029409958772540885	2.24709823439463
30	['column40_Low', 'column197_Low', 'column20_Low']	['column40_Low', 'column80_Low', 'column119_Low']	0.05596743687781982	0.05266483121070378	0.03132593243000589	0.5597171172657457	10.627910588498892	0.028378416813539795	2.151651145068677
31	['column40_Low', 'column197_Low', 'column20_Low']	['column120_Low', 'column163_High', 'column40_Low']	0.05596743687781982	0.05081290752088714	0.028912110116670057	0.5165880685189654	10.166473317957978	0.02606824192241631	1.9635160629384503
32	['column40_Low', 'column197_Low', 'column20_Low']	['column120_Low', 'column190_High', 'column40_Low']	0.05596743687781982	0.05031663070592142	0.03200692708638118	0.571884811453027	11.365721500619593	0.02919083423344295	2.2182893639380397
33	['column40_Low', 'column197_Low', 'column20_Low']	['column33_High', 'column120_Low', 'column80_Low', 'column40_Low']	0.05596743687781982	0.052030231305412365	0.03238472465722467	0.5786351218463409	11.12113298996903	0.029472725970900636	2.2497598111366357
34	['column40_Low', 'column197_Low', 'column20_Low']	['column120_Low', 'column119_Low', 'column80_Low', 'column40_Low']	0.05596743687781982	0.050878617636053385	0.030642474747170256	0.5475054148730192	10.761011998978688	0.02779492892619371	2.097530917629877
35	['column95_Low', 'column60_Low', 'column20_Low']	['column120_Low', 'column190_High', 'column80_Low']	0.051603926952124006	0.05281055501934409	0.02859773823207482	0.5541775582041774	10.493689339208544	0.02587250620855546	2.1245889757484413
36	['column95_Low', 'column60_Low', 'column20_Low']	['column33_High', 'column40_Low', 'column80_Low']	0.051603926952124006	0.05239198436626076	0.03089115688271945	0.5986202738287532	11.4257988329652	0.028187524748606106	2.360876630897512
37	['column95_Low', 'column60_Low', 'column20_Low']	['column33_High', 'column120_Low', 'column40_Low']	0.051603926952124006	0.057689762385624184	0.03101823601884184	0.6010828603726084	10.419229262112427	0.028041217734808697	2.3621703456876793
38	['column95_Low', 'column60_Low', 'column20_Low']	['column33_High', 'column120_Low', 'column80_Low']	0.051603926952124006	0.05315172626500421	0.03089115688271945	0.5986202738287532	11.262480372587495	0.028148319083160882	2.3589838051038665
39	['column95_Low', 'column60_Low', 'column20_Low']	['column40_Low', 'column80_Low', 'column119_Low']	0.051603926952124006	0.05266483121070378	0.027445522873974552	0.5318495024504118	10.098760220507778	0.024727810771231453	2.023569714755993
40	['column95_Low', 'column60_Low', 'column20_Low']	['column120_Low', 'column190_High', 'column40_Low']	0.051603926952124006	0.05031663070592142	0.02872481736819721	0.5566401447480326	11.062746788459455	0.026128281632771838	2.142014794628532
41	['column95_Low', 'column60_Low', 'column20_Low']	['column33_High', 'column120_Low', 'column80_Low', 'column40_Low']	0.051603926952124006	0.052030231305412365	0.03089115688271945	0.5986202738287532	11.505239527283873	0.028206192627132833	2.3617779047717535
42	['column95_Low', 'column60_Low', 'column20_Low']	['column120_Low', 'column119_Low', 'column80_Low', 'column40_Low']	0.051603926952124006	0.050878617636053385	0.027445522873974552	0.5318495024504118	10.453300957483856	0.024819986406058606	2.027385183465307
43	['column60_Low', 'column186_Low', 'column20_Low']	['column120_Low', 'column190_High', 'column40_Low']	0.05108565902121857	0.05031663070592142	0.026803139792376373	0.5246705299670034	10.4273780379587	0.024232681553037094	1.9979475903906254
44	['column60_Low', 'column197_Low', 'column20_Low']	['column120_Low', 'column119_Low', 'column80_Low']	0.051866450170065435	0.05784592542179267	0.030642474747170256	0.5907956809593934	10.213263538469022	0.027642211938739523	2.302405010746513
45	['column60_Low', 'column197_Low', 'column20_Low']	['column120_Low', 'column163_High', 'column80_Low']	0.051866450170065435	0.0523243488523604	0.028912110116670057	0.5574337557683212	10.65342938793542	0.026198231884237984	2.1413193245066866
46	['column60_Low', 'column197_Low', 'column20_Low']	['column120_Low', 'column190_High', 'column80_Low']	0.051866450170065435	0.05281055501934409	0.03200692708638118	0.6171027124746987	11.68521543181394	0.029267831066016867	2.4737428961756933
47	['column60_Low', 'column197_Low', 'column20_Low']	['column33_High', 'column40_Low', 'column80_Low']	0.051866450170065435	0.05239198436626076	0.03238472465722467	0.6243867577410457	11.917600856193882	0.029667338410781157	2.5228290939232694
48	['column60_Low', 'column197_Low', 'column20_Low']	['column33_High', 'column120_Low', 'column40_Low']	0.051866450170065435	0.057689762385624184	0.03238472465722467	0.6243867577410457	10.823181304983807	0.029392561471127773	2.5087247508827994
49	['column60_Low', 'column197_Low', 'column20_Low']	['column33_High', 'column120_Low', 'column80_Low']	0.051866450170065435	0.05315172626500421	0.03238472465722467	0.6243867577410457	11.747252659828474	0.02962793329544787	2.520806423225681
50	['column60_Low', 'column197_Low', 'column20_Low']	['column40_Low', 'column80_Low', 'column119_Low']	0.051866450170065435	0.05266483121070378	0.030642474747170256	0.5907956809593934	11.218030465069031	0.02791093690346538	2.3150663976625556
51	['column60_Low', 'column197_Low', 'column20_Low']	['column120_Low', 'column119_Low', 'column40_Low']	0.051866450170065435	0.057832706173088874	0.030642474747170256	0.5907956809593934	10.21559805953377	0.027642897574243708	2.3024373155099003
52	['column60_Low', 'column197_Low', 'column20_Low']	['column120_Low', 'column163_High', 'column40_Low']	0.051866450170065435	0.05081290752088714	0.028912110116670057	0.5574337557683212	10.97031803462895	0.02627662498074182	2.1447344998644393
53	['column60_Low', 'column197_Low', 'column20_Low']	['column120_Low', 'column190_High', 'column40_Low']	0.051866450170065435	0.05031663070592142	0.03200692708638118	0.6171027124746987	12.26438860903451	0.02939718206714692	2.4802561946363357
54	['column60_Low', 'column197_Low', 'column20_Low']	['column33_High', 'column120_Low', 'column80_Low', 'column40_Low']	0.051866450170065435	0.052030231305412365	0.03238472465722467	0.6243867577410457	12.000460925802088	0.029686101257885518	2.523792193782776
55	['column60_Low', 'column197_Low', 'column20_Low']	['column120_Low', 'column119_Low', 'column80_Low', 'column40_Low']	0.051866450170065435	0.050878617636053385	0.030642474747170256	0.5907956809593934	11.611865817296623	0.02800358146082808	2.3194314874026594
56	['column60_Low', 'column40_Low', 'column197_Low']	['column120_Low', 'column163_High', 'column80_Low']	0.05344922075993255	0.0523243488523604	0.028912110116670057	0.5409266908965604	10.337953605936919	0.026115414443740523	2.0643231317421393
57	['column60_Low', 'column40_Low', 'column197_Low']	['column120_Low', 'column80_Low', 'column190_High']	0.05344922075993255	0.05281055501934409	0.03200692708638118	0.5988286944376692	11.339185778644495	0.02918424407269769	2.361059806241524
58	['column60_Low', 'column40_Low', 'column197_Low']	['column40_Low', 'column80_Low', 'column33_High']	0.05344922075993255	0.05239198436626076	0.03238472465722467	0.6058970401585614	11.564689665557795	0.02958441391878146	2.4044681522183824
59	['column60_Low', 'column40_Low', 'column197_Low']	['column120_Low', 'column40_Low', 'column33_High']	0.05344922075993255	0.057689762385624184	0.03238472465722467	0.6058970401585614	10.502678726746602	0.029301251811887388	2.391025527931838
60	['column60_Low', 'column40_Low', 'column197_Low']	['column120_Low', 'column80_Low', 'column33_High']	0.05344922075993255	0.05315172626500421	0.03238472465722467	0.6058970401585614	11.399385922814174	0.02954380630631495	2.4025403770526004
61	['column60_Low', 'column40_Low', 'column197_Low']	['column119_Low', 'column80_Low', 'column40_Low']	0.05344922075993255	0.05266483121070378	0.030642474747170256	0.5733006826198849	10.885835375151933	0.027827580557504762	2.2201469048645905
62	['column60_Low', 'column40_Low', 'column197_Low']	['column120_Low', 'column163_High', 'column40_Low']	0.05344922075993255	0.05081290752088714	0.028912110116670057	0.5409266908965604	10.645458354734124	0.026196199805132124	2.0676155064054043
63	['column60_Low', 'column40_Low', 'column197_Low']	['column120_Low', 'column40_Low', 'column190_High']	0.05344922075993255	0.05031663070592142	0.03200692708638118	0.5988286944376692	11.901208130122217	0.02931754238388438	2.367276413159426
64	['column60_Low', 'column40_Low', 'column197_Low']	['column120_Low', 'column40_Low', 'column80_Low', 'column33_High']	0.05344922075993255	0.052030231305412365	0.03238472465722467	0.6058970401585614	11.645096032766125	0.029603749337991328	2.4053860673261345
65	['column60_Low', 'column40_Low', 'column197_Low']	['column120_Low', 'column119_Low', 'column80_Low', 'column40_Low']	0.05344922075993255	0.050878617636053385	0.030642474747170256	0.5733006826198849	11.2680082371899	0.02792305228118064	2.22433302258706
66	['column75_High', 'column100_High', 'column91_Low']	['column150_Low', 'column100_High', 'column140_High']	0.050123716351656605	0.051868406521107274	0.029685152988692644	0.5922376700966935	11.418081059723493	0.027085315692616248	2.3252064350910615
67	['column75_High', 'column100_High', 'column91_Low']	['column87_High', 'column50_High', 'column100_High']	0.050123716351656605	0.05588716730106236	0.029317671897429894	0.5849061887539178	10.465840675070309	0.026516399375933867	2.2744565375831014
68	['column75_High', 'column100_High', 'column91_Low']	['column150_Low', 'column87_High', 'column50_High']	0.050123716351656605	0.05350528781846066	0.029317671897429894	0.5849061887539178	10.931745489127348	0.026635788027503625	2.2801947090953467
69	['column75_High', 'column100_High', 'column91_Low']	['column50_High', 'column100_High', 'column140_High']	0.050123716351656605	0.05105107870835333	0.029685152988692644	0.5922376700966935	11.600884547025007	0.027126283200069046	2.327210857159544
70	['column75_High', 'column100_High', 'column91_Low']	['column150_Low', 'column50_High', 'column100_High']	0.050123716351656605	0.08720371890674589	0.045466423790109955	0.9070840532080234	10.401896439508997	0.04109544931881863	9.823892589039145
71	['column75_High', 'column100_High', 'column91_Low']	['column100_High', 'column50_High', 'column180_Low']	0.050123716351656605	0.054614795857316024	0.03464149365747679	0.691119816703932	12.654442918902749	0.031903997121321054	3.060685842822467
72	['column75_High', 'column100_High', 'column91_Low']	['column177_Low', 'column50_High', 'column150_Low']	0.050123716351656605	0.05009710504975299	0.02613536228066181	0.5214170892138573	10.408128148243733	0.023624309197108846	1.9848240995272735
73	['column75_High', 'column100_High', 'column91_Low']	['column100_High', 'column180_Low', 'column150_Low']	0.050123716351656605	0.05519732230521042	0.03472184168129182	0.6927228108484866	12.549935067830205	0.031955146754694484	3.0747569655387688
74	['column75_High', 'column125_Low', 'column91_Low']	['column150_Low', 'column100_High', 'column140_High']	0.055754110923953146	0.051868406521107274	0.030283164000084635	0.5431557153048305	10.471802620036135	0.027391287109458123	2.0753933566478477
75	['column75_High', 'column125_Low', 'column91_Low']	['column150_Low', 'column87_High', 'column50_High']	0.055754110923953146	0.05350528781846066	0.03077830413491307	0.5520364978448622	10.317419461752635	0.027795164382864574	2.112883544369093
76	['column75_High', 'column125_Low', 'column91_Low']	['column50_High', 'column100_High', 'column140_High']	0.055754110923953146	0.05105107870835333	0.03078101141421728	0.5520850553280566	10.814366107365341	0.027934703909124284	2.118591783059761
77	['column75_High', 'column125_Low', 'column91_Low']	['column100_High', 'column50_High', 'column180_Low']	0.055754110923953146	0.054614795857316024	0.03493205007205003	0.6265376578185643	11.471939938316831	0.03188705068573218	2.531407045274183
78	['column75_High', 'column125_Low', 'column91_Low']	['column177_Low', 'column50_High', 'column150_Low']	0.055754110923953146	0.05009710504975299	0.02868687928317627	0.5145249167779623	10.270551886520622	0.025893759731263406	1.9566460314417369
79	['column75_High', 'column125_Low', 'column91_Low']	['column100_High', 'column180_Low', 'column150_Low']	0.055754110923953146	0.05519732230521042	0.035012398095865066	0.6279787717110381	11.37697890920624	0.03193492046535517	2.539647218628417
80	['column150_Low', 'column75_High', 'column91_Low']	['column150_Low', 'column100_High', 'column140_High']	0.05246274720252492	0.051868406521107274	0.029621519556250524	0.5646200615820002	10.885625748927419	0.02690036045713588	2.1777107988117956
81	['column150_Low', 'column75_High', 'column91_Low']	['column150_Low', 'column87_High', 'column50_High']	0.05246274720252492	0.05350528781846066	0.02879817037873045	0.5489260840184225	10.259286631274401	0.025991135989912213	2.0983139983208328
82	['column150_Low', 'column75_High', 'column91_Low']	['column50_High', 'column100_High', 'column140_High']	0.05246274720252492	0.05105107870835333	0.030119366970383168	0.5741096030314934	11.245787896300683	0.027441087133690624	2.228152895783228
83	['column150_Low', 'column75_High', 'column91_Low']	['column150_Low', 'column50_High', 'column100_High']	0.05246274720252492	0.08720371890674589	0.04628628250902958	0.8822695146014374	10.117338178488934	0.04171133584890493	7.75327034457635
84	['column150_Low', 'column75_High', 'column91_Low']	['column100_High', 'column50_High', 'column180_Low']	0.05246274720252492	0.054614795857316024	0.03408621665695464	0.6497222977166957	11.896452005682283	0.031220974428374765	2.6989591343672146
85	['column150_Low', 'column75_High', 'column91_Low']	['column177_Low', 'column50_High', 'column150_Low']	0.05246274720252492	0.05009710504975299	0.029007340756790723	0.5529131107986405	11.036827582143227	0.026379108998987197	2.1246494090826014
86	['column150_Low', 'column75_High', 'column91_Low']	['column100_High', 'column180_Low', 'column150_Low']	0.05246274720252492	0.05519732230521042	0.034809559148524356	0.6635100333984997	12.020692412027872	0.03191375598216981	2.8078182753475804
87	['column100_High', 'column75_High', 'column125_Low']	['column150_Low', 'column50_High', 'column100_High']	0.08828563506405589	0.08720371890674589	0.07764888100983558	0.8795188589117269	10.085795307104606	0.0699500453062061	7.576258598218904
88	['column150_Low', 'column75_High', 'column100_High']	['column150_Low', 'column50_High', 'column100_High']	0.08444443835265057	0.08720371890674589	0.07555580207855578	0.8947398260028122	10.260340238007867	0.0681919330132132	8.671810490429563
89	['column50_High', 'column75_High', 'column91_Low']	['column100_High', 'column150_Low', 'column140_High']	0.05346462710278685	0.051868406521107274	0.030283164000084635	0.5664149483707167	10.920230374538697	0.027510038987017878	2.1867257413882166
90	['column50_High', 'column75_High', 'column91_Low']	['column50_High', 'column87_High', 'column100_High']	0.05346462710278685	0.05588716730106236	0.03033722257608531	0.5674260575644037	10.15306527360204	0.027349236016502947	2.1825467049243303
91	['column50_High', 'column75_High', 'column91_Low']	['column50_High', 'column87_High', 'column150_Low']	0.05346462710278685	0.05350528781846066	0.03128949409604898	0.5852373015881002	10.937933902416626	0.0284288538348077	2.282015031259098
92	['column50_High', 'column75_High', 'column91_Low']	['column50_High', 'column100_High', 'column140_High']	0.05346462710278685	0.05105107870835333	0.030704703667348062	0.5742994075001708	11.249505828878794	0.02797527678101093	2.2291463484209912
93	['column50_High', 'column75_High', 'column91_Low']	['column50_High', 'column100_High', 'column150_Low']	0.05346462710278685	0.08720371890674589	0.048570089927830844	0.9084527950499653	10.417592350865778	0.04390777561450543	9.970771708338306
94	['column50_High', 'column75_High', 'column91_Low']	['column180_Low', 'column50_High', 'column100_High']	0.05346462710278685	0.054614795857316024	0.03493205007205003	0.6533675060501675	11.963195976363691	0.032012090377243806	2.727341552345949
95	['column50_High', 'column75_High', 'column91_Low']	['column177_Low', 'column50_High', 'column150_Low']	0.05346462710278685	0.05009710504975299	0.028961478880605167	0.5416942088631073	10.812884463585949	0.026283055840190982	2.0726399563790756
96	['column50_High', 'column75_High', 'column91_Low']	['column180_Low', 'column100_High', 'column150_Low']	0.05346462710278685	0.05519732230521042	0.035012398095865066	0.6548703319028675	11.864168487771918	0.03206129384174465	2.737529586789642
97	['column150_Low', 'column75_High', 'column50_High']	['column177_Low', 'column150_Low', 'column50_High']	0.08965716381783595	0.05009710504975299	0.04579324573394032	0.5107594729070656	10.195388983052304	0.04130168137969528	1.9415866886469257
98	['column100_High', 'column50_High', 'column91_Low']	['column100_High', 'column140_High', 'column150_Low']	0.05217468155474148	0.051868406521107274	0.029685152988692644	0.5689570516601447	10.969241004707055	0.026978935395701995	2.1996220959665007
99	['column100_High', 'column50_High', 'column91_Low']	['column100_High', 'column87_High', 'column50_High']	0.05217468155474148	0.05588716730106236	0.030060072376707946	0.5761429007509903	10.309037451251147	0.027144177219778458	2.227431920738658
100	['column100_High', 'column50_High', 'column91_Low']	['column150_Low', 'column87_High', 'column50_High']	0.05217468155474148	0.05350528781846066	0.029613213754716806	0.5675782366519426	10.607890543037392	0.026821592401293833	2.188823025125364
101	['column100_High', 'column50_High', 'column91_Low']	['column100_High', 'column140_High', 'column50_High']	0.05217468155474148	0.05105107870835333	0.029685152988692644	0.5689570516601447	11.144858562352924	0.027021579214058268	2.2015182592511615
102	['column100_High', 'column50_High', 'column91_Low']	['column100_High', 'column150_Low', 'column50_High']	0.05217468155474148	0.08720371890674589	0.04555442495190928	0.8731136174566536	10.012343835821335	0.04100459868756062	7.193808057231268
103	['column100_High', 'column50_High', 'column91_Low']	['column100_High', 'column180_Low', 'column50_High']	0.05217468155474148	0.054614795857316024	0.035383894136754836	0.6781813148132046	12.417538217756748	0.03253438455472216	2.937633045122746
104	['column100_High', 'column50_High', 'column91_Low']	['column177_Low', 'column150_Low', 'column50_High']	0.05217468155474148	0.05009710504975299	0.026223363442461123	0.5026070626793891	10.032656820793028	0.02360956293967583	1.9097635363848284
105	['column100_High', 'column50_High', 'column91_Low']	['column100_High', 'column150_Low', 'column180_Low']	0.05217468155474148	0.05519732230521042	0.03480984284309113	0.6671788270824188	12.08715928996142	0.031929940129142347	2.838769749569862
106	['column91_Low', 'column50_High', 'column125_Low']	['column100_High', 'column140_High', 'column150_Low']	0.05586361917486257	0.051868406521107274	0.030283164000084635	0.5420909788406872	10.451274970633412	0.02738560709098254	2.0705676229711685
107	['column91_Low', 'column50_High', 'column125_Low']	['column150_Low', 'column87_High', 'column50_High']	0.05586361917486257	0.05350528781846066	0.03111629529271851	0.5570046436719263	10.410272823160962	0.028127296270186612	2.136579308701791
108	['column91_Low', 'column50_High', 'column125_Low']	['column100_High', 'column140_High', 'column50_High']	0.05586361917486257	0.05105107870835333	0.030704703667348062	0.5496368499011342	10.76641010939498	0.02785280564791868	2.1070749706838336
109	['column91_Low', 'column50_High', 'column125_Low']	['column100_High', 'column150_Low', 'column50_High']	0.05586361917486257	0.08720371890674589	0.04871735259811483	0.8720765556850385	10.000451432783752	0.04384583725447661	7.1354886196297995
110	['column91_Low', 'column50_High', 'column125_Low']	['column100_High', 'column180_Low', 'column50_High']	0.05586361917486257	0.054614795857316024	0.03527004122985548	0.6313597606244287	11.560232913327894	0.03221906107276951	2.5645198303474515
111	['column91_Low', 'column50_High', 'column125_Low']	['column177_Low', 'column150_Low', 'column50_High']	0.05586361917486257	0.05009710504975299	0.028641017406990713	0.5126953432311553	10.234031342170004	0.025842411808728226	1.949299851244471
112	['column91_Low', 'column50_High', 'column125_Low']	['column100_High', 'column150_Low', 'column180_Low']	0.05586361917486257	0.05519732230521042	0.035350389253670504	0.6327980495323408	11.464288902155802	0.032266867060940084	2.5729783746832293
113	['column147_High', 'column50_High', 'column125_Low']	['column100_High', 'column140_High', 'column150_Low']	0.05326808054824223	0.051868406521107274	0.030957696195571992	0.5811678565653433	11.204659937429222	0.028194765739096676	2.263750784989151
114	['column147_High', 'column50_High', 'column125_Low']	['column100_High', 'column140_High', 'column50_High']	0.05326808054824223	0.05105107870835333	0.03137923586283542	0.5890814074747225	11.539058965630298	0.0286598428901242	2.3093355680499474
115	['column147_High', 'column50_High', 'column125_Low']	['column100_High', 'column180_Low', 'column50_High']	0.05326808054824223	0.054614795857316024	0.031712282206925846	0.5953336760127037	10.900593267217252	0.02880305686207253	2.3362092373477625
116	['column147_High', 'column50_High', 'column125_Low']	['column100_High', 'column150_Low', 'column180_Low']	0.05326808054824223	0.05519732230521042	0.031712282206925846	0.5953336760127037	10.785553558573737	0.02877202679632461	2.3347697144288433
117	['column147_High', 'column50_High', 'column125_Low']	['column100_High', 'column150_Low', 'column187_Low']	0.05326808054824223	0.05059688112721517	0.027697918348674376	0.5199721496176263	10.276762876159621	0.02500271960930004	1.9778084086507124
118	['column91_Low', 'column150_Low', 'column125_Low']	['column140_High', 'column100_High', 'column150_Low']	0.05060104849505211	0.051868406521107274	0.029621519556250524	0.5853933947464939	11.28612644979318	0.026996923802514897	2.2868222104159903
119	['column91_Low', 'column150_Low', 'column125_Low']	['column100_High', 'column50_High', 'column87_High']	0.05060104849505211	0.05588716730106236	0.028975556319248644	0.5726275873924221	10.246137262740405	0.0261476070563965	2.2091103797236475
120	['column91_Low', 'column150_Low', 'column125_Low']	['column50_High', 'column150_Low', 'column87_High']	0.05060104849505211	0.05350528781846066	0.028477708905116	0.5627889095598605	10.518379257567217	0.025770285241472353	2.164846072931739
121	['column91_Low', 'column150_Low', 'column125_Low']	['column140_High', 'column100_High', 'column50_High']	0.05060104849505211	0.05105107870835333	0.030119366970383168	0.5952320725790555	11.65953957563799	0.027536128860937058	2.344427156909527
122	['column91_Low', 'column150_Low', 'column125_Low']	['column100_High', 'column50_High', 'column150_Low']	0.05060104849505211	0.08720371890674589	0.04628628250902958	0.9147297118468911	10.489572271855595	0.04187368289968044	10.704740195720499
123	['column91_Low', 'column150_Low', 'column125_Low']	['column100_High', 'column50_High', 'column180_Low']	0.05060104849505211	0.054614795857316024	0.03408621665695464	0.6736266870100067	12.33414272516721	0.03132265072323122	2.8966375819204
124	['column91_Low', 'column150_Low', 'column125_Low']	['column177_Low', 'column150_Low', 'column50_High']	0.05060104849505211	0.05009710504975299	0.02868687928317627	0.5669226258420581	11.316474779910529	0.026151913241092	2.1933791780214786
125	['column91_Low', 'column150_Low', 'column125_Low']	['column100_High', 'column150_Low', 'column180_Low']	0.05060104849505211	0.05519732230521042	0.03408621665695464	0.6736266870100067	12.203974013181774	0.03129317427419166	2.894852734861191
126	['column92_High', 'column100_High', 'column125_Low']	['column177_Low', 'column150_Low', 'column50_High']	0.054265300544392846	0.05009710504975299	0.029000367824108652	0.5344182660590685	10.667647672022587	0.026281833362179784	2.040249489407077
127	['column125_Low', 'column150_Low', 'column114_High']	['column187_Low', 'column150_Low', 'column100_High']	0.051895751521138005	0.05059688112721517	0.026709306954891508	0.5146723223386092	10.172016750292855	0.024083543784168993	1.9562105409845916
128	['column125_Low', 'column147_High', 'column150_Low']	['column140_High', 'column150_Low', 'column100_High']	0.05156593830511081	0.051868406521107274	0.030296051751737874	0.5875206143341944	11.327138305186018	0.02762140870108605	2.298615704027152
129	['column125_Low', 'column147_High', 'column150_Low']	['column140_High', 'column100_High', 'column50_High']	0.05156593830511081	0.05105107870835333	0.03143033194227376	0.6095173088154323	11.939361992672232	0.028797835167189454	2.4301945840746915
130	['column125_Low', 'column147_High', 'column150_Low']	['column180_Low', 'column100_High', 'column50_High']	0.05156593830511081	0.054614795857316024	0.03137429104912041	0.6084305275990844	11.140397360243561	0.028558027855395827	2.414348591441608
131	['column125_Low', 'column147_High', 'column150_Low']	['column180_Low', 'column150_Low', 'column100_High']	0.05156593830511081	0.05519732230521042	0.03137429104912041	0.6084305275990844	11.022826872557383	0.02852798933252261	2.4128609206987313
132	['column125_Low', 'column147_High', 'column150_Low']	['column150_Low', 'column100_High', 'column187_Low']	0.05156593830511081	0.05059688112721517	0.027359927190868934	0.5305813893850397	10.486444570585386	0.024750851540231933	2.0225084762383463
133	['column125_Low', 'column150_Low', 'column100_High', 'column75_High']	['column150_Low', 'column100_High', 'column50_High']	0.08305698201834273	0.08720371890674589	0.07555580207855578	0.909686341141912	10.431737918364634	0.06831292436538557	10.106957160572502
134	['column125_Low', 'column75_High', 'column91_Low', 'column50_High']	['column140_High', 'column150_Low', 'column100_High']	0.05109243619824616	0.051868406521107274	0.030283164000084635	0.5927132517733449	11.42725006468334	0.027633080749200265	2.327921538343932
135	['column125_Low', 'column75_High', 'column91_Low', 'column50_High']	['column87_High', 'column100_High', 'column50_High']	0.05109243619824616	0.05588716730106236	0.030146494088563847	0.5900382978723312	10.557670505892954	0.02729108255893361	2.302929341445961
136	['column125_Low', 'column75_High', 'column91_Low', 'column50_High']	['column87_High', 'column150_Low', 'column50_High']	0.05109243619824616	0.05350528781846066	0.03077830413491307	0.6024043170595492	11.258780984478785	0.02804458863077957	2.380545747332219
137	['column125_Low', 'column75_High', 'column91_Low', 'column50_High']	['column140_High', 'column100_High', 'column50_High']	0.05109243619824616	0.05105107870835333	0.030704703667348062	0.6009637815705108	11.771813579174713	0.028096379685589878	2.3781022309866553
138	['column125_Low', 'column75_High', 'column91_Low', 'column50_High']	['column150_Low', 'column100_High', 'column50_High']	0.05109243619824616	0.08720371890674589	0.04837936144030939	0.9468987004767273	10.858466959297045	0.04392391099581668	17.189716434212748
139	['column125_Low', 'column75_High', 'column91_Low', 'column50_High']	['column180_Low', 'column100_High', 'column50_High']	0.05109243619824616	0.054614795857316024	0.03493205007205003	0.6837029641042863	12.518639928463628	0.03214164709922988	2.988915787545942
140	['column125_Low', 'column75_High', 'column91_Low', 'column50_High']	['column150_Low', 'column177_Low', 'column50_High']	0.05109243619824616	0.05009710504975299	0.028641017406990713	0.5605725531634341	11.189719497897377	0.026081434263519374	2.161683121499554
141	['column125_Low', 'column75_High', 'column91_Low', 'column50_High']	['column180_Low', 'column150_Low', 'column100_High']	0.05109243619824616	0.05519732230521042	0.035012398095865066	0.6852755652521993	12.415014653482782	0.03219223242767207	3.001999760367802
142	['column125_Low', 'column75_High', 'column100_High', 'column50_High']	['column150_Low', 'column100_High', 'column50_High']	0.08200663644584698	0.08720371890674589	0.0753003812478165	0.9182230184204794	10.529631418614278	0.06814909757470516	11.162019720740652
143	['column125_Low', 'column75_High', 'column100_High', 'column50_High']	['column180_Low', 'column100_High', 'column50_High']	0.08200663644584698	0.054614795857316024	0.04613083377152076	0.5625256170820178	10.299875853269597	0.041652058063085695	2.1610070007686026
144	['column125_Low', 'column75_High', 'column100_High', 'column50_High']	['column180_Low', 'column150_Low', 'column100_High']	0.08200663644584698	0.05519732230521042	0.04659585084137504	0.5681960980334143	10.293906919824963	0.042069304098307406	2.1880364521761577
145	['column75_High', 'column150_Low', 'column100_High', 'column50_High']	['column150_Low', 'column100_High', 'column50_High']	0.07927197091011288	0.08720371890674589	0.07320730231653669	0.9234954231117456	10.59009219663344	0.06629449164810747	11.93126369977211
146	['column75_High', 'column150_Low', 'column100_High', 'column50_High']	['column180_Low', 'column100_High', 'column50_High']	0.07927197091011288	0.054614795857316024	0.045285000356425374	0.5712611889992542	10.459824668972553	0.040955577847962464	2.2050376123775726
147	['column75_High', 'column150_Low', 'column100_High', 'column50_High']	['column150_Low', 'column177_Low', 'column50_High']	0.07927197091011288	0.05009710504975299	0.040946420253219935	0.5165308719225539	10.310593225088976	0.03697512399903505	1.9647643247204063
148	['column75_High', 'column150_Low', 'column100_High', 'column50_High']	['column180_Low', 'column150_Low', 'column100_High']	0.07927197091011288	0.05519732230521042	0.04566966940246462	0.5761137117966931	10.437348909990696	0.04129406887436986	2.2289059683894226
149	['column125_Low', 'column150_Low', 'column75_High', 'column50_High']	['column150_Low', 'column100_High', 'column50_High']	0.08528194989219977	0.08720371890674589	0.07687648480438433	0.9014391075902893	10.33716358535434	0.06943958161816575	9.261242048203302
150	['column125_Low', 'column150_Low', 'column75_High', 'column50_High']	['column150_Low', 'column177_Low', 'column50_High']	0.08528194989219977	0.05009710504975299	0.04401759172967559	0.5161419478015666	10.302829819986007	0.03974521292707829	1.9631850511411675
151	['column100_High', 'column125_Low', 'column150_Low', 'column75_High', 'column50_High']	['column150_Low', 'column100_High', 'column50_High']	0.07892239206930217	0.08720371890674589	0.07320730231653669	0.9275859537082071	10.636999950657506	0.06632497622307727	12.60523790391625
152	['column100_High', 'column125_Low', 'column150_Low', 'column75_High', 'column50_High']	['column180_Low', 'column100_High', 'column50_High']	0.07892239206930217	0.054614795857316024	0.045285000356425374	0.5737915332908355	10.506155416013923	0.040974670024989376	2.2181286341920434
153	['column100_High', 'column125_Low', 'column150_Low', 'column75_High', 'column50_High']	['column150_Low', 'column177_Low', 'column50_High']	0.07892239206930217	0.05009710504975299	0.040946420253219935	0.5188187937494934	10.356262966377765	0.03699263688694631	1.9741063919602053
154	['column100_High', 'column125_Low', 'column150_Low', 'column75_High', 'column50_High']	['column180_Low', 'column150_Low', 'column100_High']	0.07892239206930217	0.05519732230521042	0.04566966940246462	0.5786655498525924	10.48358010290598	0.04131336469031716	2.2424054747107482
