# Supplementary material for: Subset-binding: A novel algorithm to detect paired itemsets from heterogeneous data including biological datasets
Source: Research Square preprint supplement (doi:10.21203/rs.3.rs-405195/v1), 2021-04-12
Supplement: Supplementary file 2 [file 57c926461bd19a622a99c58c.csv]

	antecedents	consequences	antecedent support	consequent support	support	confidence	lift	leverage	conviction
0	['column100_High', 'column75_High', 'column125_Low']	['column100_High', 'column50_High', 'column150_Low']	0.08828563506405589	0.08720371890674589	0.07764888100983558	0.8795188589117269	10.085795307104606	0.0699500453062061	7.576258598218904
1	['column75_High', 'column150_Low', 'column100_High']	['column50_High', 'column150_Low', 'column100_High']	0.08444443835265057	0.08720371890674589	0.07555580207855578	0.8947398260028122	10.260340238007867	0.0681919330132132	8.671810490429563
2	['column75_High', 'column50_High', 'column125_Low', 'column100_High']	['column150_Low', 'column50_High', 'column100_High']	0.08200663644584698	0.08720371890674589	0.0753003812478165	0.9182230184204794	10.529631418614278	0.06814909757470516	11.162019720740652
3	['column150_Low', 'column75_High', 'column100_High', 'column50_High']	['column150_Low', 'column100_High', 'column50_High']	0.07927197091011288	0.08720371890674589	0.07320730231653669	0.9234954231117456	10.59009219663344	0.06629449164810747	11.93126369977211
4	['column50_High', 'column75_High', 'column125_Low', 'column150_Low']	['column100_High', 'column50_High', 'column150_Low']	0.08528194989219977	0.08720371890674589	0.07687648480438433	0.9014391075902893	10.33716358535434	0.06943958161816575	9.261242048203302
5	['column100_High', 'column75_High', 'column150_Low', 'column125_Low']	['column100_High', 'column50_High', 'column150_Low']	0.08305698201834273	0.08720371890674589	0.07555580207855578	0.909686341141912	10.431737918364634	0.06831292436538557	10.106957160572502
6	['column125_Low', 'column100_High', 'column150_Low', 'column75_High', 'column50_High']	['column50_High', 'column100_High', 'column150_Low']	0.07892239206930217	0.08720371890674589	0.07320730231653669	0.9275859537082071	10.636999950657506	0.06632497622307727	12.60523790391625
