# Supplementary material for: Subset-binding: A novel algorithm to detect paired itemsets from heterogeneous data including biological datasets
Source: Research Square preprint supplement (doi:10.21203/rs.3.rs-405195/v1), 2021-04-12
Supplement: Supplementary file 3 [file 9eb72fe5421113b19df28cdb.csv]

	antecedents	consequences	antecedent support	consequent support	support	confidence	lift	leverage	conviction
0	['column1_High', 'column3_High', 'column2_High']	['column10_High', 'column30_High', 'column20_High']	0.08631296686061135	0.09066747056225356	0.07764848111876098	0.8996154800721561	9.922141584996213	0.06982270273678573	9.05849358139454
1	['column60_Low', 'column20_Low', 'column40_Low']	['column80_Low', 'column40_Low', 'column120_Low']	0.09184931336206256	0.09397596897365336	0.08179163930258185	0.8904981029108603	9.475806556041109	0.07316001107981729	8.274048716149641
2	['column75_High', 'column100_High', 'column50_High']	['column100_High', 'column50_High', 'column150_Low']	0.08946583946248345	0.08720371890674589	0.0762137073272429	0.8518749478587558	9.768791498098102	0.06841195341100044	6.162335593460992
3	['column125_Low', 'column75_High', 'column50_High']	['column100_High', 'column150_Low', 'column50_High']	0.09321047931052444	0.08720371890674589	0.07896956373566413	0.84721765535163	9.715384458059978	0.0708412632987061	5.97448797630422
4	['column150_Low', 'column50_High', 'column75_High']	['column50_High', 'column100_High', 'column150_Low']	0.08965716381783595	0.08720371890674589	0.07687648480438433	0.8574494388488665	9.832716420796316	0.0690580466928377	6.403315944337101
5	['column100_High', 'column50_High', 'column125_Low']	['column100_High', 'column50_High', 'column150_Low']	0.08874084914464463	0.08720371890674589	0.07604934162499985	0.8569823520737553	9.827360149516066	0.06831080956064432	6.382403111285889
6	['column100_High', 'column50_High', 'column150_Low']	['column100_High', 'column50_High', 'column150_Low']	0.08681974262749721	0.08720371890674589	0.07409230117736888	0.853403833449083	9.78632384201066	0.06652129674572459	6.226604027713195
7	['column125_Low', 'column50_High', 'column150_Low']	['column100_High', 'column50_High', 'column150_Low']	0.09730338249470556	0.08720371890674589	0.07762544518156768	0.7977671812774999	9.14831604980767	0.0691402283658238	4.513591250220249
8	['column75_High', 'column125_Low', 'column100_High']	['column50_High', 'column150_Low', 'column100_High']	0.08828563506405589	0.08720371890674589	0.07764888100983558	0.8795188589117269	10.085795307104606	0.0699500453062061	7.576258598218904
9	['column150_Low', 'column100_High', 'column75_High']	['column50_High', 'column150_Low', 'column100_High']	0.08444443835265057	0.08720371890674589	0.07555580207855578	0.8947398260028122	10.260340238007867	0.0681919330132132	8.671810490429563
10	['column125_Low', 'column75_High', 'column150_Low']	['column100_High', 'column50_High', 'column150_Low']	0.09358730575652614	0.08720371890674589	0.07922498456640342	0.8465355843506459	9.70756287648599	0.07106382346197164	5.947934426563569
11	['column125_Low', 'column150_Low', 'column100_High']	['column50_High', 'column150_Low', 'column100_High']	0.09422771795806811	0.08720371890674589	0.07630476245573911	0.8097910477859092	9.28619854678314	0.06808775502569961	4.798913355381143
12	['column75_High', 'column125_Low', 'column100_High', 'column50_High']	['column150_Low', 'column100_High', 'column50_High']	0.08200663644584698	0.08720371890674589	0.0753003812478165	0.9182230184204794	10.529631418614278	0.06814909757470516	11.162019720740652
13	['column50_High', 'column150_Low', 'column75_High', 'column125_Low']	['column100_High', 'column50_High', 'column150_Low']	0.08528194989219977	0.08720371890674589	0.07687648480438433	0.9014391075902893	10.33716358535434	0.06943958161816575	9.261242048203302
14	['column125_Low', 'column100_High', 'column150_Low', 'column50_High']	['column100_High', 'column150_Low', 'column50_High']	0.08489525665297147	0.08720371890674589	0.07395626269372003	0.8711471713435411	9.989793809999439	0.06655308059603826	7.084022063084911
15	['column125_Low', 'column150_Low', 'column75_High', 'column100_High']	['column50_High', 'column150_Low', 'column100_High']	0.08305698201834273	0.08720371890674589	0.07555580207855578	0.909686341141912	10.431737918364634	0.06831292436538557	10.106957160572502
