# Supplementary material for: Subset-binding: A novel algorithm to detect paired itemsets from heterogeneous data including biological datasets
Source: Research Square preprint supplement (doi:10.21203/rs.3.rs-405195/v1), 2021-04-12
Supplement: Supplementary file 4 [file a625c496ed519ebe233b047e.csv]

	antecedents	consequences	antecedent support	consequent support	support	confidence	lift	leverage	conviction
0	['column100_High', 'column300_High', 'column200_High', 'column400_Low']	['column150_Low', 'column50_High', 'column100_High']	0.08419323261775588	0.09051649642679865	0.07706910446202579	0.9153836011015968	10.112892536023796	0.06944822802262006	10.74831256604521
1	['column300_High', 'column500_Low', 'column100_High', 'column200_High']	['column150_Low', 'column100_High', 'column50_High']	0.0846764129036616	0.09051649642679865	0.07766293724372572	0.91717320775131	10.13266359124974	0.06999832501769732	10.980547222479032
2	['column300_High', 'column400_Low', 'column100_High', 'column500_Low']	['column150_Low', 'column50_High', 'column100_High']	0.08375331156496733	0.09051649642679865	0.0767882635055857	0.9168385353458071	10.12896622757887	0.06920720717858278	10.936357450594107
3	['column500_Low', 'column200_High', 'column300_High', 'column400_Low']	['column150_Low', 'column100_High', 'column50_High']	0.08441146634623083	0.09051649642679865	0.0773904048857593	0.9168233681467727	10.128798664762884	0.06974977469384985	10.93436321367361
4	['column100_High', 'column400_Low', 'column200_High', 'column500_Low', 'column300_High']	['column50_High', 'column100_High', 'column150_Low']	0.08117870592401731	0.09051649642679865	0.0758143162767294	0.9339187587899105	10.317663582407626	0.06846630423202595	13.763111692798201
