# Supplementary material for: Subset-binding: A novel algorithm to detect paired itemsets from heterogeneous data including biological datasets
Source: Research Square preprint supplement (doi:10.21203/rs.3.rs-405195/v1), 2021-04-12
Supplement: Supplementary file 5 [file d12554ed0ab5f9e360c6986e.csv]

	antecedents	consequences	antecedent support	consequent support	support	confidence	lift	leverage	conviction
0	['column1_High', 'column3_High', 'column2_High']	['column10_High', 'column20_High', 'column30_High']	0.08631296686061135	0.09066747056225356	0.07764848111876098	0.8996154800721561	9.922141584996213	0.06982270273678573	9.05849358139454
1	['column1_High', 'column3_High', 'column2_High']	['column10_High', 'column20_High', 'column126_Low']	0.08631296686061135	0.05617473681326734	0.04435357038238198	0.5138691438333884	9.147691168390537	0.039504962185414876	1.9415045377478684
2	['column1_High', 'column3_High', 'column2_High']	['column10_High', 'column126_Low', 'column30_High']	0.08631296686061135	0.055323477025960056	0.04435357038238198	0.5138691438333884	9.28844627014784	0.0395784369432265	1.9432556296123509
3	['column1_High', 'column3_High', 'column2_High']	['column20_High', 'column126_Low', 'column30_High']	0.08631296686061135	0.05306626375367205	0.04505193925249422	0.521960267282314	9.836009365671533	0.040471632587707064	1.9808682656208305
4	['column1_High', 'column2_High', 'column70_Low']	['column10_High', 'column20_High', 'column30_High']	0.05182826981851459	0.09066747056225356	0.042816932737819204	0.8261308526746097	9.111656557214493	0.0381177946097565	5.22998210680795
5	['column1_High', 'column2_High', 'column70_Low']	['column20_High', 'column126_Low', 'column30_High']	0.05182826981851459	0.05306626375367205	0.022557352686816644	0.43523260116158635	8.201681640559617	0.01980702005073087	1.6766791748141545
6	['column1_High', 'column71_Low', 'column2_High']	['column10_High', 'column20_High', 'column30_High']	0.052870878124391334	0.09066747056225356	0.04195749357955205	0.7935842011331277	8.752689318582474	0.0371638247936083	4.4053436531000205
7	['column1_High', 'column2_High', 'column179_Low']	['column10_High', 'column20_High', 'column30_High']	0.054543240269287994	0.09066747056225356	0.0415908931256536	0.7625306622839649	8.41019008863163	0.03664559549416801	3.8292629195147834
8	['column3_High', 'column2_High', 'column70_Low']	['column10_High', 'column20_High', 'column30_High']	0.05261433545209048	0.09066747056225356	0.04181707375241082	0.794784793784739	8.765931031891185	0.03704666504165587	4.4311167101520725
9	['column3_High', 'column2_High', 'column70_Low']	['column10_High', 'column20_High', 'column126_Low']	0.05261433545209048	0.05617473681326734	0.02382128473485953	0.45275274371850033	8.059721672101707	0.020865688288233385	1.7246779263909848
10	['column3_High', 'column104_Low', 'column2_High']	['column10_High', 'column20_High', 'column30_High']	0.05130453132740472	0.09066747056225356	0.0410698607785368	0.8005113723083366	8.82909126442095	0.03641820869469911	4.558317634242502
11	['column3_High', 'column2_High', 'column179_Low']	['column10_High', 'column20_High', 'column30_High']	0.0511182976142087	0.09066747056225356	0.041542503015429146	0.8126738360684788	8.963234895920973	0.03690773627130036	4.8542740125194745
12	['column3_High', 'column2_High', 'column179_Low']	['column10_High', 'column20_High', 'column127_Low']	0.0511182976142087	0.056397700087127245	0.023579445391989612	0.4612721176660534	8.17891717132874	0.020696490974178958	1.751537892980176
13	['column3_High', 'column2_High', 'column179_Low']	['column13_High', 'column145_Low', 'column20_High']	0.0511182976142087	0.05154350894282306	0.02144077287031566	0.41943440746266253	8.137482605771735	0.018805956440095802	1.6336767167203068
14	['column3_High', 'column2_High', 'column179_Low']	['column20_High', 'column126_Low', 'column30_High']	0.0511182976142087	0.05306626375367205	0.022497108999641593	0.440098947923265	8.293384851176963	0.01978445193580729	1.6912519323441988
15	['column3_High', 'column2_High', 'column179_Low']	['column20_High', 'column126_Low', 'column127_Low']	0.0511182976142087	0.05312397662203769	0.021832743682817117	0.42710232346917104	8.039728021640496	0.01911713643540153	1.652783842852623
16	['column99_High', 'column71_High', 'column2_Low']	['column10_Low', 'column146_High', 'column165_High']	0.0504768504915627	0.05283957807195248	0.02405395927328484	0.4765344715258236	9.018513941896341	0.02138678379090964	1.8094036195446876
17	['column3_Low', 'column60_Low', 'column20_Low']	['column80_Low', 'column33_High', 'column40_Low']	0.05092841248088	0.05239198436626076	0.028031182315166773	0.5504036145970678	10.505492801137631	0.02536294172467003	2.1076860188377284
18	['column3_Low', 'column60_Low', 'column20_Low']	['column120_Low', 'column33_High', 'column40_Low']	0.05092841248088	0.057689762385624184	0.02815826145128917	0.5528988648892325	9.584003158019772	0.025220213436590144	2.1075997433576683
19	['column3_Low', 'column60_Low', 'column20_Low']	['column80_Low', 'column120_Low', 'column33_High']	0.05092841248088	0.05315172626500421	0.028031182315166773	0.5504036145970678	10.355329041485163	0.025324249275871815	2.1059961878617464
20	['column3_Low', 'column60_Low', 'column20_Low']	['column80_Low', 'column40_Low', 'column115_Low']	0.05092841248088	0.05017137635692629	0.029075317859318443	0.5709056387774537	11.37911056527431	0.02652016930947943	2.2135658481665597
21	['column3_Low', 'column60_Low', 'column20_Low']	['column80_Low', 'column40_Low', 'column119_Low']	0.05092841248088	0.05266483121070378	0.025070068584397146	0.49226094753707816	9.347052600769171	0.022387932337262502	1.865791422176407
22	['column3_Low', 'column60_Low', 'column20_Low']	['column120_Low', 'column40_Low', 'column115_Low']	0.05092841248088	0.055619426650570916	0.029202396995440832	0.5734008890696182	10.30936353716858	0.026369787893030506	2.2137424789512647
23	['column3_Low', 'column60_Low', 'column20_Low']	['column120_Low', 'column40_Low', 'column119_Low']	0.05092841248088	0.057832706173088874	0.025070068584397146	0.49226094753707816	8.511808976460115	0.02212474066952854	1.855613211661937
24	['column3_Low', 'column60_Low', 'column20_Low']	['column120_Low', 'column40_Low', 'column163_High']	0.05092841248088	0.05081290752088714	0.02420442008981227	0.47526358884442566	9.353205947702637	0.02161659937623572	1.8088836076551527
25	['column3_Low', 'column60_Low', 'column20_Low']	['column120_Low', 'column40_Low', 'column190_High']	0.05092841248088	0.05031663070592142	0.03335520167048297	0.6549428903366167	13.016429779737635	0.03079265554724369	2.7522498238640316
26	['column3_Low', 'column60_Low', 'column20_Low']	['column80_Low', 'column120_Low', 'column115_Low']	0.05092841248088	0.053233380927704715	0.029075317859318443	0.5709056387774537	10.72457974354081	0.026364226277680487	2.2064298779756335
27	['column3_Low', 'column60_Low', 'column20_Low']	['column80_Low', 'column120_Low', 'column119_Low']	0.05092841248088	0.05784592542179267	0.025070068584397146	0.49226094753707816	8.509863814048785	0.022124067434177868	1.8555871761449925
28	['column3_Low', 'column60_Low', 'column20_Low']	['column80_Low', 'column120_Low', 'column163_High']	0.05092841248088	0.0523243488523604	0.024199715404064803	0.4751712104348447	9.081263711003817	0.021534919382918332	1.8056853396568284
29	['column3_Low', 'column60_Low', 'column20_Low']	['column80_Low', 'column120_Low', 'column190_High']	0.05092841248088	0.05281055501934409	0.033228122534360575	0.6524476400444521	12.354493146407298	0.030538564804991213	2.725314381700075
30	['column3_Low', 'column60_Low', 'column20_Low']	['column80_Low', 'column120_Low', 'column33_High', 'column40_Low']	0.05092841248088	0.052030231305412365	0.028031182315166773	0.5504036145970678	10.578534839990475	0.025381365233769135	2.108490636206981
31	['column3_Low', 'column60_Low', 'column20_Low']	['column80_Low', 'column120_Low', 'column40_Low', 'column119_Low']	0.05092841248088	0.050878617636053385	0.025070068584397146	0.49226094753707816	9.675202873205706	0.022478901358971244	1.869309397730948
32	['column3_Low', 'column199_High', 'column167_High']	['column86_Low', 'column120_High', 'column103_High']	0.05104953993958393	0.05043333515467605	0.022435931946059896	0.439493323007658	8.714341846712259	0.01986133338879484	1.6941219504121936
33	['column116_Low', 'column53_High', 'column4_High']	['column197_Low', 'column146_Low', 'column109_Low']	0.05240471858320197	0.05143325336289719	0.0217140979590636	0.4143538701498519	8.056147396049374	0.01901875279076245	1.6196926749602476
34	['column78_Low', 'column4_Low', 'column187_High']	['column146_High', 'column72_Low', 'column85_High']	0.0503445703295516	0.05167346341308497	0.020914703975391243	0.41543117437461946	8.039545773303484	0.018313225662419677	1.622266694725606
35	['column86_High', 'column4_Low', 'column145_High']	['column189_High', 'column149_Low', 'column31_Low']	0.05079344325874961	0.05042301601831075	0.020903904844009925	0.41154730813428453	8.161893925282735	0.018342746240948837	1.6136844934314314
36	['column39_High', 'column6_High', 'column145_High']	['column91_Low', 'column58_High', 'column130_High']	0.0514412587405582	0.052471541777712	0.02223888374134673	0.43231608801618937	8.239058227936834	0.019539681584243438	1.669112754862269
37	['column6_High', 'column40_Low', 'column60_Low']	['column80_Low', 'column40_Low', 'column119_Low']	0.05978382318982016	0.05266483121070378	0.028667564143588974	0.47952042231501874	9.105135463105013	0.025519059186166537	1.8201197691615634
38	['column6_High', 'column40_Low', 'column60_Low']	['column120_Low', 'column40_Low', 'column119_Low']	0.05978382318982016	0.057832706173088874	0.028667564143588974	0.47952042231501874	8.291509321383833	0.025210103863148207	1.8101907053059343
39	['column6_High', 'column40_Low', 'column60_Low']	['column120_Low', 'column132_High', 'column40_Low']	0.05978382318982016	0.05180347876603563	0.027867365644032267	0.4661355556928894	8.998151606731591	0.024770355628865988	1.7760997784083656
40	['column6_High', 'column40_Low', 'column60_Low']	['column163_High', 'column120_Low', 'column40_Low']	0.05978382318982016	0.05081290752088714	0.024700696473437544	0.4131668929069681	8.131140551977504	0.021662906594448143	1.6174736581939917
41	['column6_High', 'column40_Low', 'column60_Low']	['column120_Low', 'column80_Low', 'column119_Low']	0.05978382318982016	0.05784592542179267	0.028667564143588974	0.47952042231501874	8.28961450298392	0.025209313565920998	1.8101653070976844
42	['column6_High', 'column40_Low', 'column60_Low']	['column194_Low', 'column120_Low', 'column119_Low']	0.05978382318982016	0.051872953176774726	0.02780876890798895	0.4651554120199552	8.967205133565077	0.02470760544693483	1.7727150430820107
43	['column6_High', 'column40_Low', 'column60_Low']	['column120_Low', 'column80_Low', 'column40_Low', 'column119_Low']	0.05978382318982016	0.050878617636053385	0.028667564143588974	0.47952042231501874	9.424792665263434	0.025625845862692693	1.8235516301821153
44	['column135_High', 'column6_High', 'column60_Low']	['column115_Low', 'column80_Low', 'column40_Low']	0.05192659565960655	0.05017137635692629	0.02154244680788532	0.41486345357785676	8.268927099517049	0.018937218034113266	1.6232597834656968
45	['column135_High', 'column6_High', 'column60_Low']	['column115_Low', 'column120_Low', 'column80_Low']	0.05192659565960655	0.053233380927704715	0.022613393202537385	0.43548769017662053	8.180725751160693	0.019849164955510652	1.6771407861212322
46	['column70_Low', 'column156_High', 'column8_High']	['column35_High', 'column87_High', 'column15_Low']	0.052161985587137014	0.05016089555281102	0.0209512452089221	0.40165735589039026	8.007380080914071	0.018334753298058486	1.5874501237675263
47	['column194_High', 'column8_High', 'column71_High']	['column162_High', 'column183_High', 'column45_Low']	0.05431160988881067	0.050888347748506	0.022613025378953724	0.4163571182155748	8.18177709901769	0.01984919728815073	1.626185604028421
48	['column8_High', 'column100_High', 'column125_Low']	['column140_High', 'column100_High', 'column50_High']	0.051348803350506594	0.05105107870835333	0.02860777079352407	0.5571263384318348	10.913115893487946	0.0259863589920976	2.1427079631051584
49	['column8_High', 'column100_High', 'column125_Low']	['column150_Low', 'column100_High', 'column50_High']	0.051348803350506594	0.08720371890674589	0.03607576696527497	0.7025629539800962	8.05657101311705	0.03159796035169962	3.068872197689093
50	['column8_High', 'column100_High', 'column125_Low']	['column100_High', 'column177_Low', 'column50_High']	0.051348803350506594	0.05873188215012048	0.02502634255258187	0.4873792750680521	8.298376575473878	0.022010530685650204	1.8361881837197198
51	['column8_High', 'column100_High', 'column125_Low']	['column100_High', 'column180_Low', 'column50_High']	0.051348803350506594	0.054614795857316024	0.027979871640521497	0.5448982218637322	9.977117250191814	0.025175467228016113	2.077305010791705
52	['column8_High', 'column100_High', 'column125_Low']	['column150_Low', 'column177_Low', 'column50_High']	0.051348803350506594	0.05009710504975299	0.023020541139361653	0.4483169935280398	8.948960086272495	0.020448114743732215	1.7218273606521297
53	['column8_High', 'column100_High', 'column125_Low']	['column150_Low', 'column100_High', 'column140_High']	0.051348803350506594	0.051868406521107274	0.02660196938030385	0.5180640568918224	9.988046513073463	0.02393858877374738	1.967339450475622
54	['column8_High', 'column100_High', 'column125_Low']	['column150_Low', 'column100_High', 'column180_Low']	0.051348803350506594	0.05519732230521042	0.026358739273340533	0.5133272355621601	9.299857567795529	0.023524422824815754	1.9413510406446097
55	['column8_High', 'column150_Low', 'column125_Low']	['column140_High', 'column100_High', 'column50_High']	0.05223198177079397	0.05105107870835333	0.02660196938030385	0.5093042323578579	9.976365734942288	0.02393547036782977	1.933884463384454
56	['column8_High', 'column150_Low', 'column125_Low']	['column150_Low', 'column100_High', 'column50_High']	0.05223198177079397	0.08720371890674589	0.03829509345231256	0.7331732810820829	8.407591904034797	0.03374027039602996	3.4209328241001766
57	['column8_High', 'column150_Low', 'column125_Low']	['column100_High', 'column177_Low', 'column50_High']	0.05223198177079397	0.05873188215012048	0.02523986762639924	0.4832263063874855	8.227665940491134	0.022172185028569727	1.8214319526791898
58	['column8_High', 'column150_Low', 'column125_Low']	['column100_High', 'column180_Low', 'column50_High']	0.05223198177079397	0.054614795857316024	0.026264626641874525	0.5028456847976741	9.207132918914215	0.02341198762023956	1.901593077308285
59	['column8_High', 'column150_Low', 'column125_Low']	['column150_Low', 'column177_Low', 'column50_High']	0.05223198177079397	0.05009710504975299	0.025285729502584797	0.48410434843434497	9.663319825637947	0.022669058424856548	1.8412694351414949
60	['column8_High', 'column150_Low', 'column125_Low']	['column150_Low', 'column100_High', 'column140_High']	0.05223198177079397	0.051868406521107274	0.02660196938030385	0.5093042323578579	9.819160959776202	0.023892779716413244	1.9322188125542437
61	['column8_High', 'column150_Low', 'column125_Low']	['column150_Low', 'column100_High', 'column180_Low']	0.05223198177079397	0.05519732230521042	0.026649295687913778	0.5102103114688824	9.243388812372162	0.02376623015547139	1.928996669015754
62	['column180_High', 'column8_Low', 'column199_High']	['column146_High', 'column76_High', 'column90_Low']	0.05195860100901508	0.05000138957041445	0.02185657547757023	0.42065365604778315	8.412839316303353	0.019258573226984738	1.6397766557890616
63	['column28_Low', 'column67_Low', 'column11_High']	['column99_Low', 'column187_Low', 'column109_Low']	0.050154247180243354	0.050199981863935525	0.020321646294805085	0.40518295931695575	8.07137660756897	0.017803903995957528	1.5967935569656577
64	['column28_Low', 'column84_Low', 'column11_High']	['column99_Low', 'column187_Low', 'column109_Low']	0.05049064241782019	0.050199981863935525	0.021684461573883467	0.4294748598055101	8.555279182561852	0.01914983224021044	1.664782059932155
65	['column17_Low', 'column12_High', 'column160_High']	['column24_High', 'column37_High', 'column179_High']	0.05055250346893771	0.050128270323265695	0.020308466788875795	0.4017301893140556	8.014044504695452	0.01777435722946706	1.5876979127321529
66	['column189_Low', 'column145_High', 'column13_High']	['column165_Low', 'column32_High', 'column110_Low']	0.05100120205587595	0.05084246017083993	0.024527780924766596	0.4809255455958552	9.45913207149807	0.021934754340575763	1.828557602432421
67	['column189_Low', 'column162_Low', 'column13_High']	['column165_Low', 'column32_High', 'column110_Low']	0.05426832198425721	0.05084246017083993	0.02509277399071405	0.46238345084620924	9.094435031123918	0.02233363899169114	1.765491671197874
68	['column52_High', 'column15_High', 'column98_Low']	['column86_High', 'column169_Low', 'column130_Low']	0.05090019833326145	0.05050363461336696	0.022023332115768058	0.4326767446282543	8.567239723252241	0.01945268709739711	1.6736425951100198
69	['column16_High', 'column51_Low', 'column123_High']	['column136_High', 'column87_Low', 'column191_Low']	0.051308581030967665	0.057282092107308974	0.025169697893794876	0.4905553298892348	8.563851490798497	0.02223063502928366	1.8504814422491103
70	['column16_Low', 'column40_Low', 'column60_Low']	['column80_Low', 'column40_Low', 'column119_Low']	0.05254895489597078	0.05266483121070378	0.030541784553354025	0.5812063173057669	11.035947594333892	0.027774302713458838	2.2620569696629316
71	['column16_Low', 'column40_Low', 'column60_Low']	['column40_Low', 'column119_Low', 'column120_Low']	0.05254895489597078	0.057832706173088874	0.030541784553354025	0.5812063173057669	10.049785938881378	0.027502736285152447	2.249717062983493
72	['column16_Low', 'column40_Low', 'column60_Low']	['column80_Low', 'column119_Low', 'column120_Low']	0.05254895489597078	0.05784592542179267	0.030541784553354025	0.5812063173057669	10.047489310056145	0.027502041627448553	2.2496854979211487
73	['column16_Low', 'column40_Low', 'column60_Low']	['column80_Low', 'column33_High', 'column40_Low', 'column120_Low']	0.05254895489597078	0.052030231305412365	0.02196183838996513	0.4179310213389052	8.03246518136141	0.019227704111870088	1.628621011336417
74	['column16_Low', 'column40_Low', 'column60_Low']	['column80_Low', 'column40_Low', 'column119_Low', 'column120_Low']	0.05254895489597078	0.050878617636053385	0.030541784553354025	0.5812063173057669	11.423390498996477	0.027868166370027713	2.266322109392736
75	['column20_High', 'column71_High', 'column22_Low']	['column172_Low', 'column18_Low', 'column53_Low']	0.05302009852630002	0.05138251911720761	0.02484627717229791	0.46861997361195384	9.120221850995557	0.022121970946174067	1.7851959685629093
76	['column25_High', 'column20_Low', 'column132_High']	['column80_Low', 'column119_Low', 'column40_Low']	0.05202969645887276	0.05266483121070378	0.02668336810083087	0.5128488135986519	9.737975073855713	0.023943232918880186	1.9446430497016534
77	['column25_High', 'column20_Low', 'column132_High']	['column120_Low', 'column119_Low', 'column40_Low']	0.05202969645887276	0.057832706173088874	0.025196755460171322	0.4842764262537698	8.37374659253135	0.02218773731259033	1.826884287997506
78	['column25_High', 'column20_Low', 'column132_High']	['column120_Low', 'column80_Low', 'column119_Low']	0.05202969645887276	0.05784592542179267	0.025196755460171322	0.4842764262537698	8.371832980846827	0.02218704951909286	1.8268586555669235
79	['column25_High', 'column20_Low', 'column132_High']	['column120_Low', 'column194_Low', 'column119_Low']	0.05202969645887276	0.051872953176774726	0.022291579165352723	0.42843953900390824	8.259401340499254	0.019592645157139814	1.658839460607315
80	['column25_High', 'column20_Low', 'column132_High']	['column120_Low', 'column80_Low', 'column119_Low', 'column40_Low']	0.05202969645887276	0.050878617636053385	0.025196755460171322	0.4842764262537698	9.518270125142	0.022549556428320416	1.8403684273524725
81	['column40_Low', 'column20_Low', 'column36_Low']	['column80_Low', 'column33_High', 'column40_Low']	0.05160407721116209	0.05239198436626076	0.024847361888768894	0.48149997503287095	9.1903366680447	0.022143721882286378	1.827594927683589
82	['column40_Low', 'column20_Low', 'column36_Low']	['column120_Low', 'column33_High', 'column40_Low']	0.05160407721116209	0.057689762385624184	0.024847361888768894	0.48149997503287095	8.346367797709231	0.02187033493632755	1.8173774199415225
83	['column40_Low', 'column20_Low', 'column36_Low']	['column120_Low', 'column80_Low', 'column33_High']	0.05160407721116209	0.05315172626500421	0.024847361888768894	0.48149997503287095	9.05897153052387	0.022104516102683065	1.82612965890411
84	['column40_Low', 'column20_Low', 'column36_Low']	['column80_Low', 'column115_Low', 'column40_Low']	0.05160407721116209	0.05017137635692629	0.02502561308610634	0.4849541826647224	9.665953335915873	0.02243656550679324	1.8441633572664604
85	['column40_Low', 'column20_Low', 'column36_Low']	['column80_Low', 'column119_Low', 'column40_Low']	0.05160407721116209	0.05266483121070378	0.032433325840293764	0.6285031647320757	11.93402029938219	0.029715605824183786	2.550049095589404
86	['column40_Low', 'column20_Low', 'column36_Low']	['column120_Low', 'column80_Low', 'column40_Low']	0.05160407721116209	0.09397596897365336	0.04075214961615733	0.789707942056612	8.403296615946685	0.035902606457247146	4.30840821991601
87	['column40_Low', 'column20_Low', 'column36_Low']	['column120_Low', 'column115_Low', 'column40_Low']	0.05160407721116209	0.055619426650570916	0.02502561308610634	0.4849541826647224	8.719151056904044	0.02215542389878971	1.833585559893342
88	['column40_Low', 'column20_Low', 'column36_Low']	['column120_Low', 'column119_Low', 'column40_Low']	0.05160407721116209	0.057832706173088874	0.032433325840293764	0.6285031647320757	10.867607731359028	0.029448922405607234	2.5361381427311973
89	['column40_Low', 'column20_Low', 'column36_Low']	['column120_Low', 'column40_Low', 'column132_High']	0.05160407721116209	0.05180347876603563	0.027895369169613486	0.5405652164937783	10.434921155298818	0.025222098451564187	2.0638326815347097
90	['column40_Low', 'column20_Low', 'column36_Low']	['column120_Low', 'column40_Low', 'column163_High']	0.05160407721116209	0.05081290752088714	0.022587899529888645	0.43771540449138824	8.614256216522564	0.019965746326857145	1.6880901594334632
91	['column40_Low', 'column20_Low', 'column36_Low']	['column120_Low', 'column188_High', 'column40_Low']	0.05160407721116209	0.05085931251832429	0.026492494687965006	0.5133798746087181	10.094117462239597	0.023867946797862777	1.9504756132280594
92	['column40_Low', 'column20_Low', 'column36_Low']	['column120_Low', 'column190_High', 'column40_Low']	0.05160407721116209	0.05031663070592142	0.028095306134670796	0.5444396577368447	10.820272544059142	0.025498762838716896	2.0846489063911804
93	['column40_Low', 'column20_Low', 'column36_Low']	['column51_Low', 'column170_High', 'column128_High']	0.05160407721116209	0.050359505593075476	0.02220306838116259	0.43025802574297384	8.543730139442335	0.019604312566221575	1.6667904723806004
94	['column40_Low', 'column20_Low', 'column36_Low']	['column120_Low', 'column80_Low', 'column115_Low']	0.05160407721116209	0.053233380927704715	0.02502561308610634	0.4849541826647224	9.109963977740392	0.02227855358650186	1.8382182462341632
95	['column40_Low', 'column20_Low', 'column36_Low']	['column120_Low', 'column80_Low', 'column119_Low']	0.05160407721116209	0.05784592542179267	0.032433325840293764	0.6285031647320757	10.86512420968713	0.02944824023847645	2.5361025589860646
96	['column40_Low', 'column20_Low', 'column36_Low']	['column120_Low', 'column80_Low', 'column163_High']	0.05160407721116209	0.0523243488523604	0.022587899529888645	0.43771540449138824	8.365424780085773	0.01988774979168766	1.6854021232618408
97	['column40_Low', 'column20_Low', 'column36_Low']	['column120_Low', 'column188_High', 'column80_Low']	0.05160407721116209	0.05161182441890979	0.026492494687965006	0.5133798746087181	9.946942980388494	0.023829114115642643	1.948929208011094
98	['column40_Low', 'column20_Low', 'column36_Low']	['column120_Low', 'column80_Low', 'column190_High']	0.05160407721116209	0.05281055501934409	0.028095306134670796	0.5444396577368447	10.309296267335586	0.025370066175888238	2.079174495907965
99	['column40_Low', 'column20_Low', 'column36_Low']	['column120_Low', 'column194_Low', 'column119_Low']	0.05160407721116209	0.051872953176774726	0.02660359341136263	0.515532780530144	9.938373448168464	0.02392673753045735	1.9570509803753988
100	['column40_Low', 'column20_Low', 'column36_Low']	['column120_Low', 'column80_Low', 'column33_High', 'column40_Low']	0.05160407721116209	0.052030231305412365	0.024847361888768894	0.48149997503287095	9.254234758375631	0.02216238981516977	1.8282926191848987
101	['column40_Low', 'column20_Low', 'column36_Low']	['column120_Low', 'column80_Low', 'column119_Low', 'column40_Low']	0.05160407721116209	0.050878617636053385	0.032433325840293764	0.6285031647320757	12.352992159258442	0.029807781727405672	2.554857248459299
102	['column60_Low', 'column40_Low', 'column20_Low']	['column80_Low', 'column33_High', 'column40_Low']	0.09184931336206256	0.05239198436626076	0.05076915100600646	0.5527439362108084	10.55016226044614	0.04595698321628949	2.118714741630383
103	['column60_Low', 'column40_Low', 'column20_Low']	['column120_Low', 'column33_High', 'column40_Low']	0.09184931336206256	0.057689762385624184	0.05076915100600646	0.5527439362108084	9.581317609110966	0.04547038594286633	2.1068696746804125
104	['column60_Low', 'column40_Low', 'column20_Low']	['column120_Low', 'column80_Low', 'column33_High']	0.09184931336206256	0.05315172626500421	0.05076915100600646	0.5527439362108084	10.39936000300224	0.04588720144455752	2.1170160684088133
105	['column60_Low', 'column40_Low', 'column20_Low']	['column80_Low', 'column115_Low', 'column40_Low']	0.09184931336206256	0.05017137635692629	0.04534899531962125	0.4937325458368881	9.840920893307864	0.04074078885080795	1.8761400043247753
106	['column60_Low', 'column40_Low', 'column20_Low']	['column80_Low', 'column119_Low', 'column40_Low']	0.09184931336206256	0.05266483121070378	0.04762954305360889	0.5185617759150478	9.846452822384695	0.04279231446857683	1.9677190580159132
107	['column60_Low', 'column40_Low', 'column20_Low']	['column120_Low', 'column80_Low', 'column40_Low']	0.09184931336206256	0.09397596897365336	0.08179163930258185	0.8904981029108603	9.475806556041109	0.07316001107981729	8.274048716149641
108	['column60_Low', 'column40_Low', 'column20_Low']	['column120_Low', 'column115_Low', 'column40_Low']	0.09184931336206256	0.055619426650570916	0.04534899531962125	0.4937325458368881	8.876980141107227	0.040240389172174706	1.865378794515919
109	['column60_Low', 'column40_Low', 'column20_Low']	['column120_Low', 'column119_Low', 'column40_Low']	0.09184931336206256	0.057832706173088874	0.04762954305360889	0.5185617759150478	8.966583274921149	0.04231764870174076	1.9569848148589486
110	['column60_Low', 'column40_Low', 'column20_Low']	['column120_Low', 'column40_Low', 'column132_High']	0.09184931336206256	0.05180347876603563	0.04071376557227106	0.4432669563002686	8.556702500660855	0.0359556516178445	1.703143960941835
111	['column60_Low', 'column40_Low', 'column20_Low']	['column120_Low', 'column40_Low', 'column163_High']	0.09184931336206256	0.05081290752088714	0.041739385125510606	0.4544332842312857	8.943264741236987	0.03707225445978714	1.739818550223852
112	['column60_Low', 'column40_Low', 'column20_Low']	['column120_Low', 'column188_High', 'column40_Low']	0.09184931336206256	0.05085931251832429	0.040689778737895	0.4430058020956475	8.710416640728978	0.036018385805020356	1.70404052870343
113	['column60_Low', 'column40_Low', 'column20_Low']	['column120_Low', 'column190_High', 'column40_Low']	0.09184931336206256	0.05031663070592142	0.04407087317289565	0.479817121758677	9.535954912462186	0.039449325191864296	1.825672103058921
114	['column60_Low', 'column40_Low', 'column20_Low']	['column120_Low', 'column80_Low', 'column115_Low']	0.09184931336206256	0.053233380927704715	0.04534899531962125	0.4937325458368881	9.274867333852367	0.04045954583347045	1.87009180876016
115	['column60_Low', 'column40_Low', 'column20_Low']	['column120_Low', 'column80_Low', 'column119_Low']	0.09184931336206256	0.05784592542179267	0.04762954305360889	0.5185617759150478	8.964534185145679	0.04231643452282416	1.956957357029382
116	['column60_Low', 'column40_Low', 'column20_Low']	['column120_Low', 'column80_Low', 'column163_High']	0.09184931336206256	0.0523243488523604	0.041739385125510606	0.4544332842312857	8.684929563357306	0.036933429611304275	1.7370481441712329
117	['column60_Low', 'column40_Low', 'column20_Low']	['column120_Low', 'column188_High', 'column80_Low']	0.09184931336206256	0.05161182441890979	0.040689778737895	0.4430058020956475	8.583416825182736	0.0359492681036548	1.7026895058320668
118	['column60_Low', 'column40_Low', 'column20_Low']	['column120_Low', 'column80_Low', 'column190_High']	0.09184931336206256	0.05281055501934409	0.04407087317289565	0.479817121758677	9.085629219062813	0.03922025995609947	1.8208777808738956
119	['column60_Low', 'column40_Low', 'column20_Low']	['column120_Low', 'column80_Low', 'column33_High', 'column40_Low']	0.09184931336206256	0.052030231305412365	0.05076915100600646	0.5527439362108084	10.6235148747707	0.04599020998653504	2.1195235692576344
120	['column60_Low', 'column40_Low', 'column20_Low']	['column120_Low', 'column80_Low', 'column119_Low', 'column40_Low']	0.09184931336206256	0.050878617636053385	0.04762954305360889	0.5185617759150478	10.192135714543998	0.042956376958926464	1.971429219538807
121	['column135_High', 'column40_Low', 'column20_Low']	['column80_Low', 'column33_High', 'column40_Low']	0.05577799761503803	0.05239198436626076	0.024920498944054074	0.44678009268183877	8.52764212094923	0.02199817896502567	1.7128957275370829
122	['column135_High', 'column40_Low', 'column20_Low']	['column120_Low', 'column80_Low', 'column33_High']	0.05577799761503803	0.05315172626500421	0.024920498944054074	0.44678009268183877	8.405749428612719	0.021955802083209516	1.7115224184990434
123	['column135_High', 'column40_Low', 'column20_Low']	['column80_Low', 'column115_Low', 'column40_Low']	0.05577799761503803	0.05017137635692629	0.0288925870042489	0.5179925461587261	10.324463544186104	0.02609412809346909	1.9705683305799135
124	['column135_High', 'column40_Low', 'column20_Low']	['column80_Low', 'column119_Low', 'column40_Low']	0.05577799761503803	0.05266483121070378	0.026819572357749896	0.4808270914070821	9.129946500414437	0.02388203352808288	1.8247006981870448
125	['column135_High', 'column40_Low', 'column20_Low']	['column120_Low', 'column115_Low', 'column40_Low']	0.05577799761503803	0.055619426650570916	0.0288925870042489	0.5179925461587261	9.313158681282614	0.025790246757183572	1.959265496463496
126	['column135_High', 'column40_Low', 'column20_Low']	['column120_Low', 'column119_Low', 'column40_Low']	0.05577799761503803	0.057832706173088874	0.02613611467491426	0.46857391431111234	8.102230473336427	0.02291032212792051	1.772903738072209
127	['column135_High', 'column40_Low', 'column20_Low']	['column120_Low', 'column40_Low', 'column132_High']	0.05577799761503803	0.05180347876603563	0.02473140826249801	0.44339003406300653	8.559078359689432	0.021841913947435402	1.703520560645688
128	['column135_High', 'column40_Low', 'column20_Low']	['column120_Low', 'column40_Low', 'column163_High']	0.05577799761503803	0.05081290752088714	0.02657308315192619	0.476407979636077	9.375727603074964	0.023738840917413	1.8128372006498104
129	['column135_High', 'column40_Low', 'column20_Low']	['column120_Low', 'column190_High', 'column40_Low']	0.05577799761503803	0.05031663070592142	0.025329072392381354	0.4541050857937666	9.024950188891047	0.02252251148486972	1.7396816577325689
130	['column135_High', 'column40_Low', 'column20_Low']	['column120_Low', 'column80_Low', 'column115_Low']	0.05577799761503803	0.053233380927704715	0.0288925870042489	0.5179925461587261	9.73059642524307	0.025923335609822976	1.9642157222408176
131	['column135_High', 'column40_Low', 'column20_Low']	['column120_Low', 'column80_Low', 'column119_Low']	0.05577799761503803	0.05784592542179267	0.02613611467491426	0.46857391431111234	8.100378909913394	0.022909584784697838	1.7728788630255004
132	['column135_High', 'column40_Low', 'column20_Low']	['column120_Low', 'column80_Low', 'column163_High']	0.05577799761503803	0.0523243488523604	0.02657308315192619	0.476407979636077	9.104900301393542	0.023654535746430814	1.8099505230980353
133	['column135_High', 'column40_Low', 'column20_Low']	['column120_Low', 'column80_Low', 'column190_High']	0.05577799761503803	0.05281055501934409	0.025329072392381354	0.4541050857937666	8.59875616962237	0.022383405380463545	1.7351131515081633
134	['column135_High', 'column40_Low', 'column20_Low']	['column120_Low', 'column80_Low', 'column33_High', 'column40_Low']	0.05577799761503803	0.052030231305412365	0.024920498944054074	0.44678009268183877	8.586932663421836	0.022018356826390906	1.713549632170779
135	['column135_High', 'column40_Low', 'column20_Low']	['column120_Low', 'column80_Low', 'column119_Low', 'column40_Low']	0.05577799761503803	0.050878617636053385	0.02613611467491426	0.46857391431111234	9.209643187692928	0.02329820726175404	1.7859894497531117
136	['column40_Low', 'column20_Low', 'column197_Low']	['column40_Low', 'column33_High', 'column80_Low']	0.05596743687781982	0.05239198436626076	0.03238472465722467	0.5786351218463409	11.044344451648003	0.029452479579302245	2.2489012842882814
137	['column40_Low', 'column20_Low', 'column197_Low']	['column120_Low', 'column33_High', 'column40_Low']	0.05596743687781982	0.057689762385624184	0.03238472465722467	0.5786351218463409	10.030117960592122	0.029155976522410823	2.236328385373267
138	['column40_Low', 'column20_Low', 'column197_Low']	['column120_Low', 'column33_High', 'column80_Low']	0.05596743687781982	0.05315172626500421	0.03238472465722467	0.5786351218463409	10.886478436492887	0.029409958772540885	2.24709823439463
139	['column40_Low', 'column20_Low', 'column197_Low']	['column40_Low', 'column80_Low', 'column119_Low']	0.05596743687781982	0.05266483121070378	0.03132593243000589	0.5597171172657457	10.627910588498892	0.028378416813539795	2.151651145068677
140	['column40_Low', 'column20_Low', 'column197_Low']	['column120_Low', 'column80_Low', 'column40_Low']	0.05596743687781982	0.09397596897365336	0.04242905020834188	0.7581024355459939	8.066981844672778	0.037169456096776986	3.745486371767981
141	['column40_Low', 'column20_Low', 'column197_Low']	['column120_Low', 'column40_Low', 'column119_Low']	0.05596743687781982	0.057832706173088874	0.030642474747170256	0.5475054148730192	9.467055081848967	0.027405726414954402	2.082162582260551
142	['column40_Low', 'column20_Low', 'column197_Low']	['column120_Low', 'column163_High', 'column40_Low']	0.05596743687781982	0.05081290752088714	0.028912110116670057	0.5165880685189654	10.166473317957978	0.02606824192241631	1.9635160629384503
143	['column40_Low', 'column20_Low', 'column197_Low']	['column120_Low', 'column40_Low', 'column190_High']	0.05596743687781982	0.05031663070592142	0.03200692708638118	0.571884811453027	11.365721500619593	0.02919083423344295	2.2182893639380397
144	['column40_Low', 'column20_Low', 'column197_Low']	['column120_Low', 'column80_Low', 'column119_Low']	0.05596743687781982	0.05784592542179267	0.030642474747170256	0.5475054148730192	9.46489162167944	0.027404986567487	2.0821333681016676
145	['column40_Low', 'column20_Low', 'column197_Low']	['column120_Low', 'column163_High', 'column80_Low']	0.05596743687781982	0.0523243488523604	0.028912110116670057	0.5165880685189654	9.872804532677174	0.025983650425102554	1.9603894513820441
146	['column40_Low', 'column20_Low', 'column197_Low']	['column120_Low', 'column80_Low', 'column190_High']	0.05596743687781982	0.05281055501934409	0.03200692708638118	0.571884811453027	10.828986956178554	0.029051255681853405	2.2124640057630893
147	['column40_Low', 'column20_Low', 'column197_Low']	['column120_Low', 'column33_High', 'column80_Low', 'column40_Low']	0.05596743687781982	0.052030231305412365	0.03238472465722467	0.5786351218463409	11.12113298996903	0.029472725970900636	2.2497598111366357
148	['column40_Low', 'column20_Low', 'column197_Low']	['column120_Low', 'column40_Low', 'column80_Low', 'column119_Low']	0.05596743687781982	0.050878617636053385	0.030642474747170256	0.5475054148730192	10.761011998978688	0.02779492892619371	2.097530917629877
149	['column20_Low', 'column60_Low', 'column95_Low']	['column40_Low', 'column33_High', 'column80_Low']	0.051603926952124006	0.05239198436626076	0.03089115688271945	0.5986202738287532	11.4257988329652	0.028187524748606106	2.360876630897512
150	['column20_Low', 'column60_Low', 'column95_Low']	['column120_Low', 'column33_High', 'column40_Low']	0.051603926952124006	0.057689762385624184	0.03101823601884184	0.6010828603726084	10.419229262112427	0.028041217734808697	2.3621703456876793
151	['column20_Low', 'column60_Low', 'column95_Low']	['column120_Low', 'column33_High', 'column80_Low']	0.051603926952124006	0.05315172626500421	0.03089115688271945	0.5986202738287532	11.262480372587495	0.028148319083160882	2.3589838051038665
152	['column20_Low', 'column60_Low', 'column95_Low']	['column40_Low', 'column115_Low', 'column80_Low']	0.051603926952124006	0.05017137635692629	0.02357166684246478	0.4567804861892313	9.104404131543653	0.020982626801854434	1.7485171270447915
153	['column20_Low', 'column60_Low', 'column95_Low']	['column40_Low', 'column80_Low', 'column119_Low']	0.051603926952124006	0.05266483121070378	0.027445522873974552	0.5318495024504118	10.098760220507778	0.024727810771231453	2.023569714755993
154	['column20_Low', 'column60_Low', 'column95_Low']	['column120_Low', 'column80_Low', 'column40_Low']	0.051603926952124006	0.09397596897365336	0.04252352879703164	0.8240366830315689	8.768589374828279	0.03767399975886016	5.148936986615754
155	['column20_Low', 'column60_Low', 'column95_Low']	['column120_Low', 'column115_Low', 'column40_Low']	0.051603926952124006	0.055619426650570916	0.02369874597858717	0.45924307273308657	8.256882538870483	0.02082856514859209	1.7464049478247183
156	['column20_Low', 'column60_Low', 'column95_Low']	['column120_Low', 'column40_Low', 'column119_Low']	0.051603926952124006	0.057832706173088874	0.027445522873974552	0.5318495024504118	9.196344726781883	0.024461128129174822	2.012530796738315
157	['column20_Low', 'column60_Low', 'column95_Low']	['column120_Low', 'column163_High', 'column40_Low']	0.051603926952124006	0.05081290752088714	0.021931183275585436	0.4249905883312385	8.363831338652329	0.019309037707652542	1.6507331414357773
158	['column20_Low', 'column60_Low', 'column95_Low']	['column188_High', 'column40_Low', 'column120_Low']	0.051603926952124006	0.05085931251832429	0.024585069567523873	0.4764185793521661	9.367381424601747	0.021960529319493022	1.8127852709274745
159	['column20_Low', 'column60_Low', 'column95_Low']	['column120_Low', 'column40_Low', 'column190_High']	0.051603926952124006	0.05031663070592142	0.02872481736819721	0.5566401447480326	11.062746788459455	0.026128281632771838	2.142014794628532
160	['column20_Low', 'column60_Low', 'column95_Low']	['column120_Low', 'column115_Low', 'column80_Low']	0.051603926952124006	0.053233380927704715	0.02357166684246478	0.4567804861892313	8.580715299852484	0.020824615341656916	1.7428803549978928
161	['column20_Low', 'column60_Low', 'column95_Low']	['column120_Low', 'column80_Low', 'column119_Low']	0.051603926952124006	0.05784592542179267	0.027445522873974552	0.5318495024504118	9.194243130736478	0.02446044596403035	2.012502559560798
162	['column20_Low', 'column60_Low', 'column95_Low']	['column120_Low', 'column163_High', 'column80_Low']	0.051603926952124006	0.0523243488523604	0.02192647858983797	0.4248994191891724	8.120491291503283	0.01922633671384331	1.6478433212700339
163	['column20_Low', 'column60_Low', 'column95_Low']	['column188_High', 'column80_Low', 'column120_Low']	0.051603926952124006	0.05161182441890979	0.024457990431401483	0.47395599280831086	9.183089304524964	0.021794617614222214	1.8028685102680009
164	['column20_Low', 'column60_Low', 'column95_Low']	['column120_Low', 'column80_Low', 'column190_High']	0.051603926952124006	0.05281055501934409	0.02859773823207482	0.5541775582041774	10.493689339208544	0.02587250620855546	2.1245889757484413
165	['column20_Low', 'column60_Low', 'column95_Low']	['column120_Low', 'column33_High', 'column80_Low', 'column40_Low']	0.051603926952124006	0.052030231305412365	0.03089115688271945	0.5986202738287532	11.505239527283873	0.028206192627132833	2.3617779047717535
166	['column20_Low', 'column60_Low', 'column95_Low']	['column120_Low', 'column40_Low', 'column80_Low', 'column119_Low']	0.051603926952124006	0.050878617636053385	0.027445522873974552	0.5318495024504118	10.453300957483856	0.024819986406058606	2.027385183465307
167	['column20_Low', 'column60_Low', 'column184_High']	['column40_Low', 'column115_Low', 'column80_Low']	0.051410161399569436	0.05017137635692629	0.024583865259640597	0.4781907815571746	9.531147364889046	0.022004546703492476	1.8202603366754175
168	['column20_Low', 'column60_Low', 'column184_High']	['column40_Low', 'column80_Low', 'column119_Low']	0.051410161399569436	0.05266483121070378	0.02499499187746082	0.4861877729422992	9.231735140233104	0.02228748440483746	1.843738079597921
169	['column20_Low', 'column60_Low', 'column184_High']	['column120_Low', 'column115_Low', 'column40_Low']	0.051410161399569436	0.055619426650570916	0.024710944395762987	0.4806626496210522	8.64199217012458	0.021851540694705622	1.8184337649898232
170	['column20_Low', 'column60_Low', 'column184_High']	['column120_Low', 'column40_Low', 'column119_Low']	0.051410161399569436	0.057832706173088874	0.02499499187746082	0.4861877729422992	8.406796173209953	0.022021803118928446	1.8336801738295463
171	['column20_Low', 'column60_Low', 'column184_High']	['column40_Low', 'column132_High', 'column120_Low']	0.051410161399569436	0.05180347876603563	0.024969893985300442	0.48569958361402005	9.37581018077233	0.022306668780879384	1.8436627523986828
172	['column20_Low', 'column60_Low', 'column184_High']	['column120_Low', 'column163_High', 'column40_Low']	0.051410161399569436	0.05081290752088714	0.022342960840327386	0.4346020364860109	8.552985012860432	0.019730661063497183	1.6787946786717212
173	['column20_Low', 'column60_Low', 'column184_High']	['column120_Low', 'column40_Low', 'column190_High']	0.051410161399569436	0.05031663070592142	0.02321475240274249	0.45155960943816287	8.974361023442333	0.020627966297068537	1.7316072733468761
174	['column20_Low', 'column60_Low', 'column184_High']	['column120_Low', 'column115_Low', 'column80_Low']	0.051410161399569436	0.053233380927704715	0.024583865259640597	0.4781907815571746	8.982912098079902	0.021847128554302535	1.8143922828684802
175	['column20_Low', 'column60_Low', 'column184_High']	['column120_Low', 'column80_Low', 'column119_Low']	0.051410161399569436	0.05784592542179267	0.02499499187746082	0.4861877729422992	8.404875008865094	0.022021123515219003	1.833654446048058
176	['column20_Low', 'column60_Low', 'column184_High']	['column120_Low', 'column163_High', 'column80_Low']	0.051410161399569436	0.0523243488523604	0.02233825615457992	0.4345105237262882	8.304174504919558	0.019648252934952697	1.675850198649744
177	['column20_Low', 'column60_Low', 'column184_High']	['column120_Low', 'column80_Low', 'column190_High']	0.051410161399569436	0.05281055501934409	0.0230876732666201	0.44908774137428525	8.503749699464207	0.02037267410947478	1.719310888712986
178	['column20_Low', 'column60_Low', 'column184_High']	['column120_Low', 'column119_Low', 'column194_Low']	0.051410161399569436	0.051872953176774726	0.02287801709705055	0.4450096337811177	8.57883745821442	0.020211220201960253	1.7083666754123332
179	['column20_Low', 'column60_Low', 'column184_High']	['column120_Low', 'column40_Low', 'column80_Low', 'column119_Low']	0.051410161399569436	0.050878617636053385	0.02499499187746082	0.4861877729422992	9.555836921909194	0.022379313933004335	1.8472144732697473
180	['column20_Low', 'column60_Low', 'column186_Low']	['column40_Low', 'column115_Low', 'column80_Low']	0.05108565902121857	0.05017137635692629	0.022197046995930714	0.4345064235485562	8.660444562202477	0.01963400917073555	1.6796452925308
181	['column20_Low', 'column60_Low', 'column186_Low']	['column40_Low', 'column132_High', 'column120_Low']	0.05108565902121857	0.05180347876603563	0.02627255869851072	0.5142844234934572	9.927604009301437	0.023626143846156085	1.9521641205204208
182	['column20_Low', 'column60_Low', 'column186_Low']	['column120_Low', 'column40_Low', 'column190_High']	0.05108565902121857	0.05031663070592142	0.026803139792376373	0.5246705299670034	10.4273780379587	0.024232681553037094	1.9979475903906254
183	['column20_Low', 'column60_Low', 'column186_Low']	['column120_Low', 'column115_Low', 'column80_Low']	0.05108565902121857	0.053233380927704715	0.022197046995930714	0.4345064235485562	8.162292455905655	0.01947758464931135	1.6742305456648976
184	['column20_Low', 'column60_Low', 'column186_Low']	['column120_Low', 'column80_Low', 'column190_High']	0.05108565902121857	0.05281055501934409	0.026676060656253983	0.5221829602936904	9.887852155737027	0.02397819864981447	1.982326636075696
185	['column20_Low', 'column60_Low', 'column186_Low']	['column120_Low', 'column119_Low', 'column194_Low']	0.05108565902121857	0.051872953176774726	0.021829108859536185	0.4273040473153024	8.237511480387834	0.019179144861123834	1.6555504581070863
186	['column20_Low', 'column60_Low', 'column186_Low']	['column120_Low', 'column40_Low', 'column80_Low', 'column119_Low']	0.05108565902121857	0.050878617636053385	0.021350932241651552	0.4179437566379125	8.214526574357064	0.01875176452962517	1.6306351717518026
187	['column20_Low', 'column60_Low', 'column197_Low']	['column40_Low', 'column33_High', 'column80_Low']	0.051866450170065435	0.05239198436626076	0.03238472465722467	0.6243867577410457	11.917600856193882	0.029667338410781157	2.5228290939232694
188	['column20_Low', 'column60_Low', 'column197_Low']	['column120_Low', 'column33_High', 'column40_Low']	0.051866450170065435	0.057689762385624184	0.03238472465722467	0.6243867577410457	10.823181304983807	0.029392561471127773	2.5087247508827994
189	['column20_Low', 'column60_Low', 'column197_Low']	['column120_Low', 'column33_High', 'column80_Low']	0.051866450170065435	0.05315172626500421	0.03238472465722467	0.6243867577410457	11.747252659828474	0.02962793329544787	2.520806423225681
190	['column20_Low', 'column60_Low', 'column197_Low']	['column40_Low', 'column115_Low', 'column80_Low']	0.051866450170065435	0.05017137635692629	0.02233294409799502	0.4305855524094535	8.582294999168585	0.019730732906214903	1.6680795994239943
191	['column20_Low', 'column60_Low', 'column197_Low']	['column40_Low', 'column80_Low', 'column119_Low']	0.051866450170065435	0.05266483121070378	0.030642474747170256	0.5907956809593934	11.218030465069031	0.02791093690346538	2.3150663976625556
192	['column20_Low', 'column60_Low', 'column197_Low']	['column120_Low', 'column80_Low', 'column40_Low']	0.051866450170065435	0.09397596897365336	0.04242905020834188	0.8180442283831038	8.704823555609696	0.03755485029638628	4.979364067296308
193	['column20_Low', 'column60_Low', 'column197_Low']	['column120_Low', 'column40_Low', 'column119_Low']	0.051866450170065435	0.057832706173088874	0.030642474747170256	0.5907956809593934	10.21559805953377	0.027642897574243708	2.3024373155099003
194	['column20_Low', 'column60_Low', 'column197_Low']	['column40_Low', 'column132_High', 'column120_Low']	0.051866450170065435	0.05180347876603563	0.02276514196161992	0.4389184508863642	8.472760157067603	0.020078279411565293	1.6899442206429178
195	['column20_Low', 'column60_Low', 'column197_Low']	['column120_Low', 'column163_High', 'column40_Low']	0.051866450170065435	0.05081290752088714	0.028912110116670057	0.5574337557683212	10.97031803462895	0.02627662498074182	2.1447344998644393
196	['column20_Low', 'column60_Low', 'column197_Low']	['column188_High', 'column40_Low', 'column120_Low']	0.051866450170065435	0.05085931251832429	0.021783097060312638	0.41998434419336234	8.257766835563194	0.019145205061897187	1.6364052900635753
197	['column20_Low', 'column60_Low', 'column197_Low']	['column120_Low', 'column40_Low', 'column190_High']	0.051866450170065435	0.05031663070592142	0.03200692708638118	0.6171027124746987	12.26438860903451	0.02939718206714692	2.4802561946363357
198	['column20_Low', 'column60_Low', 'column197_Low']	['column120_Low', 'column115_Low', 'column80_Low']	0.051866450170065435	0.053233380927704715	0.02233294409799502	0.4305855524094535	8.088638085832345	0.01957191759872411	1.6627021373948252
199	['column20_Low', 'column60_Low', 'column197_Low']	['column120_Low', 'column80_Low', 'column119_Low']	0.051866450170065435	0.05784592542179267	0.030642474747170256	0.5907956809593934	10.213263538469022	0.027642211938739523	2.302405010746513
200	['column20_Low', 'column60_Low', 'column197_Low']	['column120_Low', 'column163_High', 'column80_Low']	0.051866450170065435	0.0523243488523604	0.028912110116670057	0.5574337557683212	10.65342938793542	0.026198231884237984	2.1413193245066866
201	['column20_Low', 'column60_Low', 'column197_Low']	['column188_High', 'column80_Low', 'column120_Low']	0.051866450170065435	0.05161182441890979	0.021783097060312638	0.41998434419336234	8.137366755039306	0.019106174940903088	1.6351078907726218
202	['column20_Low', 'column60_Low', 'column197_Low']	['column120_Low', 'column80_Low', 'column190_High']	0.051866450170065435	0.05281055501934409	0.03200692708638118	0.6171027124746987	11.68521543181394	0.029267831066016867	2.4737428961756933
203	['column20_Low', 'column60_Low', 'column197_Low']	['column120_Low', 'column119_Low', 'column194_Low']	0.051866450170065435	0.051872953176774726	0.023128644978537647	0.4459268930628739	8.596520262558146	0.020438179037420325	1.7111948494746465
204	['column20_Low', 'column60_Low', 'column197_Low']	['column120_Low', 'column33_High', 'column80_Low', 'column40_Low']	0.051866450170065435	0.052030231305412365	0.03238472465722467	0.6243867577410457	12.000460925802088	0.029686101257885518	2.523792193782776
205	['column20_Low', 'column60_Low', 'column197_Low']	['column120_Low', 'column40_Low', 'column80_Low', 'column119_Low']	0.051866450170065435	0.050878617636053385	0.030642474747170256	0.5907956809593934	11.611865817296623	0.02800358146082808	2.3194314874026594
206	['column127_High', 'column99_Low', 'column22_Low']	['column116_Low', 'column36_High', 'column8_High']	0.05530916322613276	0.05175821292660371	0.023119054017390183	0.41799681406980266	8.075951437167035	0.020256350570339723	1.629272502276515
207	['column127_High', 'column99_Low', 'column22_Low']	['column159_Low', 'column114_High', 'column8_High']	0.05530916322613276	0.05031735321518835	0.024164542532219068	0.4368994416607207	8.682878047902609	0.02138153183013324	1.6865240723356003
208	['column71_High', 'column92_High', 'column23_Low']	['column172_Low', 'column18_Low', 'column37_Low']	0.050236544075717725	0.05375525022929131	0.021876680404126464	0.43547343485955975	8.101040047289551	0.019176202406681435	1.67617399818077
209	['column24_Low', 'column44_Low', 'column199_Low']	['column70_Low', 'column159_High', 'column114_Low']	0.050276299087365105	0.053211966431870296	0.022327442804786258	0.4440947963569846	8.345769309720575	0.019652142065430714	1.7031465569372988
210	['column24_Low', 'column44_Low', 'column199_Low']	['column159_High', 'column107_High', 'column114_Low']	0.050276299087365105	0.050490589279513054	0.022016938960770095	0.4379188476564528	8.673276622543634	0.019478458993055985	1.689274594534245
211	['column162_High', 'column132_Low', 'column25_Low']	['column36_High', 'column108_High', 'column161_High']	0.0508586468415164	0.050032756146224384	0.020674500280446585	0.4065090513491561	8.124858246087896	0.01812990200509805	1.6006431875891167
212	['column26_High', 'column52_High', 'column145_Low']	['column86_High', 'column130_Low', 'column169_Low']	0.05290469496102741	0.05050363461336696	0.02322350884954315	0.43896876953266434	8.691825309073518	0.020551629465899786	1.6924126747733956
213	['column28_Low', 'column67_Low', 'column102_Low']	['column34_Low', 'column180_High', 'column114_Low']	0.050142006613412116	0.05028106692967418	0.02111898567703131	0.42118349670079513	8.376582328491262	0.01859779208651417	1.640794496454418
214	['column49_Low', 'column33_High', 'column29_Low']	['column147_High', 'column109_Low', 'column9_Low']	0.051225956064703045	0.0502218637346932	0.020941868308709862	0.40881361554791434	8.140152219510453	0.018369205323548965	1.6065629406292325
215	['column49_Low', 'column33_High', 'column29_Low']	['column151_High', 'column109_Low', 'column9_Low']	0.051225956064703045	0.05087810955327875	0.021030684788660457	0.410547433455352	8.069235218447597	0.01842440498402905	1.6101751766226813
216	['column63_High', 'column33_High', 'column29_Low']	['column44_Low', 'column151_High', 'column9_Low']	0.051953660128044185	0.05328382110473472	0.022507475943401998	0.43322214234628365	8.130463119278586	0.0197391864114031	1.6703478551797615
217	['column111_Low', 'column31_High', 'column73_Low']	['column126_Low', 'column4_High', 'column21_Low']	0.052334796795678304	0.05063720533942738	0.021278766792269813	0.40658926937931605	8.02945712848682	0.018628678940529844	1.599840962881775
218	['column46_High', 'column120_Low', 'column33_High']	['column58_High', 'column156_Low', 'column20_Low']	0.05108035986033722	0.05037250195763179	0.021757388436607066	0.42594430611091294	8.455889415006103	0.019184342909545692	1.654242799350833
219	['column119_Low', 'column37_Low', 'column62_Low']	['column119_High', 'column184_Low', 'column35_High']	0.05069506164741181	0.052157790343636455	0.021750233718521216	0.4290404826765144	8.2258178471485	0.019106091321657786	1.6600865401098996
220	['column190_Low', 'column39_Low', 'column51_Low']	['column111_High', 'column122_Low', 'column52_High']	0.05475690308254982	0.0509592392164673	0.022997181951854417	0.41998689949985984	8.24162420706121	0.020206811828917846	1.6362402158937157
221	['column196_Low', 'column39_Low', 'column114_High']	['column180_Low', 'column130_High', 'column115_High']	0.05081309479948661	0.050444325832288806	0.02117085176517879	0.4166416520922612	8.25943543139938	0.01860761945456651	1.6277399261935108
222	['column119_High', 'column60_Low', 'column40_Low']	['column80_Low', 'column33_High', 'column40_Low']	0.05141724106220437	0.05239198436626076	0.02265389411871281	0.44058945308454456	8.409482068945533	0.01996004282882554	1.693940203413706
223	['column119_High', 'column60_Low', 'column40_Low']	['column120_Low', 'column33_High', 'column80_Low']	0.05141724106220437	0.05315172626500421	0.02265389411871281	0.44058945308454456	8.2892783366593	0.019920978996472792	1.6925820919105667
224	['column119_High', 'column60_Low', 'column40_Low']	['column120_Low', 'column80_Low', 'column33_High', 'column40_Low']	0.05141724106220437	0.052030231305412365	0.02265389411871281	0.44058945308454456	8.467951074411483	0.01997864317316017	1.6945868717020376
225	['column135_High', 'column60_Low', 'column40_Low']	['column115_Low', 'column80_Low', 'column40_Low']	0.060737033664996186	0.05017137635692629	0.02836671896964625	0.46704156027946564	9.30892461384487	0.025319458394836424	1.78218141013234
226	['column135_High', 'column60_Low', 'column40_Low']	['column80_Low', 'column119_Low', 'column40_Low']	0.060737033664996186	0.05266483121070378	0.02613611467491426	0.4303159554856061	8.170840874130574	0.0229374090487084	1.6629132901147285
227	['column135_High', 'column60_Low', 'column40_Low']	['column115_Low', 'column40_Low', 'column120_Low']	0.060737033664996186	0.055619426650570916	0.02836671896964625	0.46704156027946564	8.39709411629959	0.02498855998074274	1.7719591303303701
228	['column135_High', 'column60_Low', 'column40_Low']	['column120_Low', 'column163_High', 'column40_Low']	0.060737033664996186	0.05081290752088714	0.02657308315192619	0.43751038778900264	8.610221479830882	0.023486857877213732	1.6874748828660324
229	['column135_High', 'column60_Low', 'column40_Low']	['column120_Low', 'column190_High', 'column40_Low']	0.060737033664996186	0.05031663070592142	0.025329072392381354	0.4170284728109621	8.288084217091367	0.022272989499286626	1.629039026782741
230	['column135_High', 'column60_Low', 'column40_Low']	['column115_Low', 'column80_Low', 'column120_Low']	0.060737033664996186	0.053233380927704715	0.029437665364298312	0.484674070957531	9.104702021758829	0.026204427714790746	1.8372190602391958
231	['column135_High', 'column60_Low', 'column40_Low']	['column120_Low', 'column163_High', 'column80_Low']	0.060737033664996186	0.0523243488523604	0.02657308315192619	0.43751038778900264	8.361506590812857	0.023395057414181374	1.6847878264321685
232	['column135_High', 'column60_Low', 'column40_Low']	['column120_Low', 'column190_High', 'column80_Low']	0.060737033664996186	0.05281055501934409	0.02640001878703342	0.43466098348902754	8.230570258726019	0.023192462328956383	1.675436184868858
233	['column135_High', 'column60_Low', 'column40_Low']	['column120_Low', 'column80_Low', 'column119_Low', 'column40_Low']	0.060737033664996186	0.050878617636053385	0.02613611467491426	0.4303159554856061	8.457697466620584	0.023045898362724814	1.6660487361428387
234	['column197_Low', 'column60_Low', 'column40_Low']	['column80_Low', 'column33_High', 'column40_Low']	0.05344922075993255	0.05239198436626076	0.03238472465722467	0.6058970401585614	11.564689665557795	0.02958441391878146	2.4044681522183824
235	['column197_Low', 'column60_Low', 'column40_Low']	['column120_Low', 'column33_High', 'column40_Low']	0.05344922075993255	0.057689762385624184	0.03238472465722467	0.6058970401585614	10.502678726746602	0.029301251811887388	2.391025527931838
236	['column197_Low', 'column60_Low', 'column40_Low']	['column120_Low', 'column33_High', 'column80_Low']	0.05344922075993255	0.05315172626500421	0.03238472465722467	0.6058970401585614	11.399385922814174	0.02954380630631495	2.4025403770526004
237	['column197_Low', 'column60_Low', 'column40_Low']	['column115_Low', 'column80_Low', 'column40_Low']	0.05344922075993255	0.05017137635692629	0.02233294409799502	0.41783479310771526	8.328150898934469	0.019651323127264003	1.6315448130496333
238	['column197_Low', 'column60_Low', 'column40_Low']	['column80_Low', 'column119_Low', 'column40_Low']	0.05344922075993255	0.05266483121070378	0.030642474747170256	0.5733006826198849	10.885835375151933	0.027827580557504762	2.2201469048645905
239	['column197_Low', 'column60_Low', 'column40_Low']	['column120_Low', 'column80_Low', 'column40_Low']	0.05344922075993255	0.09397596897365336	0.042799072871463936	0.8007426911553339	8.520717582383494	0.037776130559662564	4.547005258073875
240	['column197_Low', 'column60_Low', 'column40_Low']	['column120_Low', 'column119_Low', 'column40_Low']	0.05344922075993255	0.057832706173088874	0.030642474747170256	0.5733006826198849	9.913087603129615	0.027551361667780515	2.20803562473854
241	['column197_Low', 'column60_Low', 'column40_Low']	['column120_Low', 'column132_High', 'column40_Low']	0.05344922075993255	0.05180347876603563	0.02276514196161992	0.4259209327647577	8.221859668698697	0.019996286388921605	1.6516828000722394
242	['column197_Low', 'column60_Low', 'column40_Low']	['column120_Low', 'column163_High', 'column40_Low']	0.05344922075993255	0.05081290752088714	0.028912110116670057	0.5409266908965604	10.645458354734124	0.026196199805132124	2.0676155064054043
243	['column197_Low', 'column60_Low', 'column40_Low']	['column120_Low', 'column188_High', 'column40_Low']	0.05344922075993255	0.05085931251832429	0.021791563371781005	0.4077059134249669	8.016347316493377	0.019073172749290688	1.6024821266916982
244	['column197_Low', 'column60_Low', 'column40_Low']	['column120_Low', 'column190_High', 'column40_Low']	0.05344922075993255	0.05031663070592142	0.03200692708638118	0.5988286944376692	11.901208130122217	0.02931754238388438	2.367276413159426
245	['column197_Low', 'column60_Low', 'column40_Low']	['column120_Low', 'column119_Low', 'column80_Low']	0.05344922075993255	0.05784592542179267	0.030642474747170256	0.5733006826198849	9.910822213311874	0.027550655109238265	2.208004644495157
246	['column197_Low', 'column60_Low', 'column40_Low']	['column120_Low', 'column163_High', 'column80_Low']	0.05344922075993255	0.0523243488523604	0.028912110116670057	0.5409266908965604	10.337953605936919	0.026115414443740523	2.0643231317421393
247	['column197_Low', 'column60_Low', 'column40_Low']	['column120_Low', 'column190_High', 'column80_Low']	0.05344922075993255	0.05281055501934409	0.03200692708638118	0.5988286944376692	11.339185778644495	0.02918424407269769	2.361059806241524
248	['column197_Low', 'column60_Low', 'column40_Low']	['column120_Low', 'column119_Low', 'column194_Low']	0.05344922075993255	0.051872953176774726	0.023128644978537647	0.43272183672087705	8.341954915237432	0.02035607605272257	1.6713617907352971
249	['column197_Low', 'column60_Low', 'column40_Low']	['column120_Low', 'column80_Low', 'column33_High', 'column40_Low']	0.05344922075993255	0.052030231305412365	0.03238472465722467	0.6058970401585614	11.645096032766125	0.029603749337991328	2.4053860673261345
250	['column197_Low', 'column60_Low', 'column40_Low']	['column120_Low', 'column80_Low', 'column119_Low', 'column40_Low']	0.05344922075993255	0.050878617636053385	0.030642474747170256	0.5733006826198849	11.2680082371899	0.02792305228118064	2.22433302258706
251	['column135_High', 'column169_Low', 'column40_Low']	['column34_High', 'column58_High', 'column20_Low']	0.05946007052644012	0.051338968182325154	0.024931346133243482	0.4192956031250797	8.167199653019782	0.021878727464367764	1.6336384517198854
252	['column121_Low', 'column62_High', 'column41_Low']	['column41_Low', 'column162_Low', 'column11_High']	0.05239378326014878	0.05861196080166575	0.02531839447404394	0.4832327978365586	8.244610677191764	0.02224749210334913	1.8216868935513348
253	['column123_High', 'column46_Low', 'column149_High']	['column79_Low', 'column78_Low', 'column176_High']	0.05012603298724217	0.05105688004871583	0.020581888224239814	0.4106027745997417	8.042065520023272	0.01802260937069222	1.6100230524615367
254	['column50_High', 'column75_High', 'column91_Low']	['column100_High', 'column50_High', 'column87_High']	0.05346462710278685	0.05588716730106236	0.03033722257608531	0.5674260575644037	10.15306527360204	0.027349236016502947	2.1825467049243303
255	['column50_High', 'column75_High', 'column91_Low']	['column50_High', 'column87_High', 'column150_Low']	0.05346462710278685	0.05350528781846066	0.03128949409604898	0.5852373015881002	10.937933902416626	0.0284288538348077	2.282015031259098
256	['column50_High', 'column75_High', 'column91_Low']	['column100_High', 'column50_High', 'column140_High']	0.05346462710278685	0.05105107870835333	0.030704703667348062	0.5742994075001708	11.249505828878794	0.02797527678101093	2.2291463484209912
257	['column50_High', 'column75_High', 'column91_Low']	['column100_High', 'column50_High', 'column150_Low']	0.05346462710278685	0.08720371890674589	0.048570089927830844	0.9084527950499653	10.417592350865778	0.04390777561450543	9.970771708338306
258	['column50_High', 'column75_High', 'column91_Low']	['column100_High', 'column50_High', 'column177_Low']	0.05346462710278685	0.05873188215012048	0.028641017406990713	0.5357003117580483	9.121116030110903	0.0255009392287897	2.027285698626992
259	['column50_High', 'column75_High', 'column91_Low']	['column100_High', 'column50_High', 'column180_Low']	0.05346462710278685	0.054614795857316024	0.03493205007205003	0.6533675060501675	11.963195976363691	0.032012090377243806	2.727341552345949
260	['column50_High', 'column75_High', 'column91_Low']	['column50_High', 'column177_Low', 'column150_Low']	0.05346462710278685	0.05009710504975299	0.028961478880605167	0.5416942088631073	10.812884463585949	0.026283055840190982	2.0726399563790756
261	['column50_High', 'column75_High', 'column91_Low']	['column100_High', 'column140_High', 'column150_Low']	0.05346462710278685	0.051868406521107274	0.030283164000084635	0.5664149483707167	10.920230374538697	0.027510038987017878	2.1867257413882166
262	['column50_High', 'column75_High', 'column91_Low']	['column100_High', 'column180_Low', 'column150_Low']	0.05346462710278685	0.05519732230521042	0.035012398095865066	0.6548703319028675	11.864168487771918	0.03206129384174465	2.737529586789642
263	['column50_High', 'column75_High', 'column91_Low']	['column100_High', 'column187_Low', 'column150_Low']	0.05346462710278685	0.05059688112721517	0.023128190142508644	0.432588636558602	8.549709525987367	0.020423046760478052	1.6732183739052642
264	['column100_High', 'column50_High', 'column75_High']	['column100_High', 'column50_High', 'column87_High']	0.08946583946248345	0.05588716730106236	0.042428555493960796	0.4742430825986131	8.485724102706458	0.037428563156190996	1.7957211811217284
265	['column100_High', 'column50_High', 'column75_High']	['column50_High', 'column87_High', 'column150_Low']	0.08946583946248345	0.05350528781846066	0.04423826115349382	0.49447097818877195	9.241534778141444	0.03945136566313345	1.8722856084313482
266	['column100_High', 'column50_High', 'column75_High']	['column100_High', 'column50_High', 'column140_High']	0.08946583946248345	0.05105107870835333	0.03817341632182478	0.42668147475252155	8.357932595118799	0.03360608870971663	1.655186217612668
267	['column100_High', 'column50_High', 'column75_High']	['column100_High', 'column50_High', 'column150_Low']	0.08946583946248345	0.08720371890674589	0.0762137073272429	0.8518749478587558	9.768791498098102	0.06841195341100044	6.162335593460992
268	['column100_High', 'column50_High', 'column75_High']	['column100_High', 'column50_High', 'column180_Low']	0.08946583946248345	0.054614795857316024	0.04613083377152076	0.5156251151129615	9.441125010520203	0.04124467521307382	1.9517634659426204
269	['column100_High', 'column50_High', 'column75_High']	['column50_High', 'column177_Low', 'column150_Low']	0.08946583946248345	0.05009710504975299	0.040946420253219935	0.4576765891789389	9.135789158363663	0.036464440695303565	1.7515432230965708
270	['column100_High', 'column50_High', 'column75_High']	['column100_High', 'column140_High', 'column150_Low']	0.08946583946248345	0.051868406521107274	0.03916308856680081	0.4377434873700977	8.439501359887792	0.0345226380358086	1.6862972187624752
271	['column100_High', 'column50_High', 'column75_High']	['column100_High', 'column180_Low', 'column150_Low']	0.08946583946248345	0.05519732230521042	0.04659585084137504	0.5208228204343236	9.435653736144369	0.04165757606525813	1.9717188505328103
272	['column50_High', 'column75_High', 'column101_High']	['column100_High', 'column50_High', 'column87_High']	0.05267108567919902	0.05588716730106236	0.026036787773843217	0.494327911378628	8.845105866892476	0.023093149996561233	1.8670455695367705
273	['column50_High', 'column75_High', 'column101_High']	['column50_High', 'column87_High', 'column150_Low']	0.05267108567919902	0.05350528781846066	0.026036787773843217	0.494327911378628	9.238860896437838	0.023218606174866874	1.871755893749237
274	['column50_High', 'column75_High', 'column101_High']	['column100_High', 'column50_High', 'column140_High']	0.05267108567919902	0.05105107870835333	0.024713010988589548	0.46919501790997376	9.190697430516797	0.022024095247926336	1.7877543604718877
275	['column50_High', 'column75_High', 'column101_High']	['column100_High', 'column50_High', 'column150_Low']	0.05267108567919902	0.08720371890674589	0.03847916559995437	0.7305557708515327	8.377575865001539	0.033886051049872364	3.3877002449745968
276	['column50_High', 'column75_High', 'column101_High']	['column100_High', 'column50_High', 'column180_Low']	0.05267108567919902	0.054614795857316024	0.024928207102949376	0.47328067727288325	8.665795959566589	0.02205158651099672	1.79485574830994
277	['column50_High', 'column75_High', 'column101_High']	['column100_High', 'column140_High', 'column150_Low']	0.05267108567919902	0.051868406521107274	0.027019148413614816	0.5129787636840999	9.890004303011485	0.024287183129698048	1.9467972293181468
278	['column50_High', 'column75_High', 'column101_High']	['column100_High', 'column180_Low', 'column150_Low']	0.05267108567919902	0.05519732230521042	0.024928207102949376	0.47328067727288325	8.574341245321738	0.022020904210549273	1.7937497960071493
279	['column50_High', 'column75_High', 'column101_High']	['column100_High', 'column187_Low', 'column150_Low']	0.05267108567919902	0.05059688112721517	0.021633355033739664	0.4107254436618373	8.117603980948052	0.018968362372787866	1.6111388293642153
280	['column125_Low', 'column50_High', 'column75_High']	['column100_High', 'column50_High', 'column87_High']	0.09321047931052444	0.05588716730106236	0.04253478009318981	0.45633045133785927	8.165209892990674	0.03732551044175032	1.7365563972126186
281	['column125_Low', 'column50_High', 'column75_High']	['column50_High', 'column87_High', 'column150_Low']	0.09321047931052444	0.05350528781846066	0.04496830319982083	0.48243827874773554	9.016646735638759	0.03998104967661455	1.8287571768086937
282	['column125_Low', 'column50_High', 'column75_High']	['column100_High', 'column50_High', 'column140_High']	0.09321047931052444	0.05105107870835333	0.039192967000480194	0.4204781188809411	8.236419866523596	0.03443447148475527	1.6374686654785542
283	['column125_Low', 'column50_High', 'column75_High']	['column100_High', 'column50_High', 'column150_Low']	0.09321047931052444	0.08720371890674589	0.07896956373566413	0.84721765535163	9.715384458059978	0.0708412632987061	5.97448797630422
284	['column125_Low', 'column50_High', 'column75_High']	['column100_High', 'column50_High', 'column177_Low']	0.09321047931052444	0.05873188215012048	0.045078367534796014	0.48361909377829143	8.2343537457585	0.03960394064877405	1.8228174328462585
285	['column125_Low', 'column50_High', 'column75_High']	['column100_High', 'column50_High', 'column180_Low']	0.09321047931052444	0.054614795857316024	0.04642139018609401	0.4980275879865854	9.11891329389399	0.04133071888678714	1.8833409596171589
286	['column125_Low', 'column50_High', 'column75_High']	['column50_High', 'column177_Low', 'column150_Low']	0.09321047931052444	0.05009710504975299	0.04401759172967559	0.47223865873529036	9.426466025657481	0.03934801655591842	1.799872064660764
287	['column125_Low', 'column50_High', 'column75_High']	['column100_High', 'column140_High', 'column150_Low']	0.09321047931052444	0.051868406521107274	0.038771427333216764	0.4159556695771552	8.019441842846794	0.03393674830031122	1.6233897738420826
288	['column125_Low', 'column50_High', 'column75_High']	['column100_High', 'column180_Low', 'column150_Low']	0.09321047931052444	0.05519732230521042	0.04688640725594828	0.5030164805799289	9.113059466880081	0.041741438387222114	1.9010744637916315
289	['column50_High', 'column75_High', 'column150_Low']	['column100_High', 'column50_High', 'column87_High']	0.08965716381783595	0.05588716730106236	0.041287534577005396	0.46050458010129314	8.239898394215794	0.03627684966297924	1.7499923036903628
290	['column50_High', 'column75_High', 'column150_Low']	['column50_High', 'column87_High', 'column150_Low']	0.08965716381783595	0.05350528781846066	0.04521379827546377	0.5042965486542544	9.425172150560034	0.04041666592040358	1.9093970590924407
291	['column50_High', 'column75_High', 'column150_Low']	['column100_High', 'column50_High', 'column140_High']	0.08965716381783595	0.05105107870835333	0.03853132255664608	0.4297628980873568	8.418292207742049	0.03395422762981401	1.6641304434747561
292	['column50_High', 'column75_High', 'column150_Low']	['column100_High', 'column50_High', 'column150_Low']	0.08965716381783595	0.08720371890674589	0.07687648480438433	0.8574494388488665	9.832716420796316	0.0690580466928377	6.403315944337101
293	['column50_High', 'column75_High', 'column150_Low']	['column100_High', 'column50_High', 'column177_Low']	0.08965716381783595	0.05873188215012048	0.045078367534796014	0.502786008560181	8.560699745243046	0.03981263355553283	1.8930845351398506
294	['column50_High', 'column75_High', 'column150_Low']	['column100_High', 'column50_High', 'column180_Low']	0.08965716381783595	0.054614795857316024	0.045575556770998615	0.5083314576356479	9.30757772973628	0.04067894907194156	1.922810028879383
295	['column50_High', 'column75_High', 'column150_Low']	['column50_High', 'column177_Low', 'column150_Low']	0.08965716381783595	0.05009710504975299	0.04579324573394032	0.5107594729070656	10.195388983052304	0.04130168137969528	1.9415866886469257
296	['column50_High', 'column75_High', 'column150_Low']	['column100_High', 'column140_High', 'column150_Low']	0.08965716381783595	0.051868406521107274	0.03810978288938265	0.4250612139238926	8.194992721646821	0.03345940866894963	1.649100071939457
297	['column50_High', 'column75_High', 'column150_Low']	['column100_High', 'column180_Low', 'column150_Low']	0.08965716381783595	0.05519732230521042	0.04701627549003175	0.524400655652667	9.500472735851638	0.0420674401218076	1.9865516824699292
298	['column50_High', 'column75_High', 'column150_Low']	['column100_High', 'column187_Low', 'column150_Low']	0.08965716381783595	0.05059688112721517	0.038521674347331045	0.4296552858352601	8.491734594371195	0.03398530148743674	1.6646128127323305
299	['column50_High', 'column173_High', 'column75_High']	['column100_High', 'column50_High', 'column87_High']	0.051886243387885986	0.05588716730106236	0.024775406965559722	0.47749471435706403	8.543906184845897	0.021875631800717298	1.8068962336662664
300	['column50_High', 'column173_High', 'column75_High']	['column50_High', 'column87_High', 'column150_Low']	0.051886243387885986	0.05350528781846066	0.024775406965559722	0.47749471435706403	8.92425279492313	0.02199921857927218	1.8114548085707687
301	['column50_High', 'column173_High', 'column75_High']	['column100_High', 'column50_High', 'column140_High']	0.051886243387885986	0.05105107870835333	0.02366595155197559	0.45611225648108766	8.934429360186183	0.021017102856899846	1.7447514355665
302	['column50_High', 'column173_High', 'column75_High']	['column100_High', 'column50_High', 'column150_Low']	0.051886243387885986	0.08720371890674589	0.04065768001061176	0.7835926703474589	8.985771251171284	0.03613300662708755	4.217954551534
303	['column50_High', 'column173_High', 'column75_High']	['column50_High', 'column177_Low', 'column150_Low']	0.051886243387885986	0.05009710504975299	0.02193276424777893	0.42270865677856395	8.437786102784958	0.019333413662138955	1.6454480152942212
304	['column50_High', 'column173_High', 'column75_High']	['column100_High', 'column140_High', 'column150_Low']	0.051886243387885986	0.051868406521107274	0.02597208897700086	0.5005582844539604	9.650542941786032	0.023280832212104877	1.8983828622370893
305	['column125_Low', 'column50_High', 'column88_High']	['column100_High', 'column50_High', 'column177_Low']	0.051098175115494415	0.05873188215012048	0.025004134049529725	0.4893351669216023	8.331678621687054	0.02200304205056029	1.8432209482209934
306	['column125_Low', 'column50_High', 'column88_High']	['column50_High', 'column177_Low', 'column150_Low']	0.051098175115494415	0.05009710504975299	0.02298126265822951	0.44974722886455765	8.977509347454303	0.020421392011617915	1.7263027916972227
307	['column100_High', 'column50_High', 'column91_Low']	['column100_High', 'column50_High', 'column87_High']	0.05217468155474148	0.05588716730106236	0.030060072376707946	0.5761429007509903	10.309037451251147	0.027144177219778458	2.227431920738658
308	['column100_High', 'column50_High', 'column91_Low']	['column50_High', 'column87_High', 'column150_Low']	0.05217468155474148	0.05350528781846066	0.029613213754716806	0.5675782366519426	10.607890543037392	0.026821592401293833	2.188823025125364
309	['column100_High', 'column50_High', 'column91_Low']	['column100_High', 'column50_High', 'column140_High']	0.05217468155474148	0.05105107870835333	0.029685152988692644	0.5689570516601447	11.144858562352924	0.027021579214058268	2.2015182592511615
310	['column100_High', 'column50_High', 'column91_Low']	['column100_High', 'column50_High', 'column150_Low']	0.05217468155474148	0.08720371890674589	0.04555442495190928	0.8731136174566536	10.012343835821335	0.04100459868756062	7.193808057231268
311	['column100_High', 'column50_High', 'column91_Low']	['column100_High', 'column50_High', 'column177_Low']	0.05217468155474148	0.05873188215012048	0.026877762759939854	0.5151495315163506	8.771207607473105	0.023813445511646714	1.9413575504910991
312	['column100_High', 'column50_High', 'column91_Low']	['column100_High', 'column50_High', 'column180_Low']	0.05217468155474148	0.054614795857316024	0.035383894136754836	0.6781813148132046	12.417538217756748	0.03253438455472216	2.937633045122746
313	['column100_High', 'column50_High', 'column91_Low']	['column50_High', 'column177_Low', 'column150_Low']	0.05217468155474148	0.05009710504975299	0.026223363442461123	0.5026070626793891	10.032656820793028	0.02360956293967583	1.9097635363848284
314	['column100_High', 'column50_High', 'column91_Low']	['column100_High', 'column140_High', 'column150_Low']	0.05217468155474148	0.051868406521107274	0.029685152988692644	0.5689570516601447	10.969241004707055	0.026978935395701995	2.1996220959665007
315	['column100_High', 'column50_High', 'column91_Low']	['column100_High', 'column180_Low', 'column150_Low']	0.05217468155474148	0.05519732230521042	0.03480984284309113	0.6671788270824188	12.08715928996142	0.031929940129142347	2.838769749569862
316	['column125_Low', 'column50_High', 'column91_Low']	['column100_High', 'column50_High', 'column87_High']	0.05586361917486257	0.05588716730106236	0.03048448524636929	0.5456947776861306	9.764223238341827	0.027362425815500913	2.0781465550635274
317	['column125_Low', 'column50_High', 'column91_Low']	['column50_High', 'column87_High', 'column150_Low']	0.05586361917486257	0.05350528781846066	0.03111629529271851	0.5570046436719263	10.410272823160962	0.028127296270186612	2.136579308701791
318	['column125_Low', 'column50_High', 'column91_Low']	['column100_High', 'column50_High', 'column140_High']	0.05586361917486257	0.05105107870835333	0.030704703667348062	0.5496368499011342	10.76641010939498	0.02785280564791868	2.1070749706838336
319	['column125_Low', 'column50_High', 'column91_Low']	['column100_High', 'column50_High', 'column150_Low']	0.05586361917486257	0.08720371890674589	0.04871735259811483	0.8720765556850385	10.000451432783752	0.04384583725447661	7.1354886196297995
320	['column125_Low', 'column50_High', 'column91_Low']	['column100_High', 'column50_High', 'column177_Low']	0.05586361917486257	0.05873188215012048	0.028641017406990713	0.5126953432311553	8.729421303418992	0.025360041909133473	1.9315803877006137
321	['column125_Low', 'column50_High', 'column91_Low']	['column100_High', 'column50_High', 'column180_Low']	0.05586361917486257	0.054614795857316024	0.03527004122985548	0.6313597606244287	11.560232913327894	0.03221906107276951	2.5645198303474515
322	['column125_Low', 'column50_High', 'column91_Low']	['column50_High', 'column177_Low', 'column150_Low']	0.05586361917486257	0.05009710504975299	0.028641017406990713	0.5126953432311553	10.234031342170004	0.025842411808728226	1.949299851244471
323	['column125_Low', 'column50_High', 'column91_Low']	['column100_High', 'column140_High', 'column150_Low']	0.05586361917486257	0.051868406521107274	0.030283164000084635	0.5420909788406872	10.451274970633412	0.02738560709098254	2.0705676229711685
324	['column125_Low', 'column50_High', 'column91_Low']	['column100_High', 'column180_Low', 'column150_Low']	0.05586361917486257	0.05519732230521042	0.035350389253670504	0.6327980495323408	11.464288902155802	0.032266867060940084	2.5729783746832293
325	['column125_Low', 'column50_High', 'column91_Low']	['column100_High', 'column187_Low', 'column150_Low']	0.05586361917486257	0.05059688112721517	0.023466181300314082	0.42006195887274983	8.302131465704235	0.02063965640158754	1.6370768108734337
326	['column100_High', 'column125_Low', 'column50_High']	['column100_High', 'column50_High', 'column87_High']	0.08874084914464463	0.05588716730106236	0.041998465428496064	0.47327094380221635	8.468329433351329	0.03703899074591097	1.7924069720285734
327	['column100_High', 'column125_Low', 'column50_High']	['column50_High', 'column87_High', 'column150_Low']	0.08874084914464463	0.05350528781846066	0.04380017848877785	0.49357402944595463	9.224771037969434	0.03905207381403904	1.8689695379288023
328	['column100_High', 'column125_Low', 'column50_High']	['column100_High', 'column50_High', 'column140_High']	0.08874084914464463	0.05105107870835333	0.03817341632182478	0.4301673546035533	8.426214792855422	0.033643100247495415	1.6653116120285447
329	['column100_High', 'column125_Low', 'column50_High']	['column100_High', 'column50_High', 'column150_Low']	0.08874084914464463	0.08720371890674589	0.07604934162499985	0.8569823520737553	9.827360149516066	0.06831080956064432	6.382403111285889
330	['column100_High', 'column125_Low', 'column50_High']	['column100_High', 'column50_High', 'column180_Low']	0.08874084914464463	0.054614795857316024	0.04613083377152076	0.5198376420348315	9.51825661663067	0.04128427041128112	1.9688865411046306
331	['column100_High', 'column125_Low', 'column50_High']	['column50_High', 'column177_Low', 'column150_Low']	0.08874084914464463	0.05009710504975299	0.041429656267181605	0.4668611655907489	9.31912463059681	0.03698399662537806	1.781717694609125
332	['column100_High', 'column125_Low', 'column50_High']	['column100_High', 'column140_High', 'column150_Low']	0.08874084914464463	0.051868406521107274	0.03817341632182478	0.4301673546035533	8.293436861772522	0.03357056988336209	1.663877282459404
333	['column100_High', 'column125_Low', 'column50_High']	['column100_High', 'column180_Low', 'column150_Low']	0.08874084914464463	0.05519732230521042	0.04659585084137504	0.5250778112955101	9.51274064332546	0.04169759358950004	1.9893841563226533
334	['column100_High', 'column150_Low', 'column50_High']	['column87_High', 'column50_High', 'column100_High']	0.08681974262749721	0.05588716730106236	0.041288146178909295	0.47556172051853873	8.509318748554621	0.036436036697651185	1.8002363092801499
335	['column100_High', 'column150_Low', 'column50_High']	['column87_High', 'column150_Low', 'column50_High']	0.08681974262749721	0.05350528781846066	0.04268897145624227	0.4916965907097954	9.189682193245726	0.03804365613863336	1.862066425057478
336	['column100_High', 'column150_Low', 'column50_High']	['column140_High', 'column50_High', 'column100_High']	0.08681974262749721	0.05105107870835333	0.037511771877990666	0.4320649974618801	8.463386247530606	0.03307953036367533	1.6708759225100815
337	['column100_High', 'column150_Low', 'column50_High']	['column100_High', 'column150_Low', 'column50_High']	0.08681974262749721	0.08720371890674589	0.07409230117736888	0.853403833449083	9.78632384201066	0.06652129674572459	6.226604027713195
338	['column100_High', 'column150_Low', 'column50_High']	['column50_High', 'column100_High', 'column177_Low']	0.08681974262749721	0.05873188215012048	0.04253351038233619	0.48990597178832385	8.341397446383708	0.03743442349003423	1.8452835473291935
339	['column100_High', 'column150_Low', 'column50_High']	['column50_High', 'column100_High', 'column180_Low']	0.08681974262749721	0.054614795857316024	0.045285000356425374	0.5215979567080965	9.55048807782415	0.0405433578364399	1.9761312005221607
340	['column100_High', 'column150_Low', 'column50_High']	['column150_Low', 'column50_High', 'column177_Low']	0.08681974262749721	0.05009710504975299	0.04156569475083044	0.47875855759178343	9.556611247622262	0.03721627698402819	1.822385592675724
341	['column100_High', 'column150_Low', 'column50_High']	['column140_High', 'column150_Low', 'column100_High']	0.08681974262749721	0.051868406521107274	0.037511771877990666	0.4320649974618801	8.33002257908301	0.033008570173329733	1.6694368004114237
342	['column100_High', 'column150_Low', 'column50_High']	['column150_Low', 'column100_High', 'column180_Low']	0.08681974262749721	0.05519732230521042	0.04566966940246462	0.52602861999271	9.529966274162087	0.04087745208619924	1.993374953737202
343	['column100_High', 'column150_Low', 'column50_High']	['column150_Low', 'column187_Low', 'column100_High']	0.08681974262749721	0.05059688112721517	0.035217069769641236	0.4056343488685651	8.016983257301634	0.030824261572422344	1.5973384684419436
344	['column50_High', 'column125_Low', 'column147_High']	['column140_High', 'column50_High', 'column100_High']	0.05326808054824223	0.05105107870835333	0.03137923586283542	0.5890814074747225	11.539058965630298	0.0286598428901242	2.3093355680499474
345	['column50_High', 'column125_Low', 'column147_High']	['column100_High', 'column150_Low', 'column50_High']	0.05326808054824223	0.08720371890674589	0.042815366420249544	0.8037715265800466	9.217170284212141	0.03817019169741873	4.65170148442095
346	['column50_High', 'column125_Low', 'column147_High']	['column50_High', 'column100_High', 'column177_Low']	0.05326808054824223	0.05873188215012048	0.02735550308268551	0.5135439986036479	8.743870957362029	0.024226968453563022	1.9349501602365018
347	['column50_High', 'column125_Low', 'column147_High']	['column50_High', 'column100_High', 'column180_Low']	0.05326808054824223	0.054614795857316024	0.031712282206925846	0.5953336760127037	10.900593267217252	0.02880305686207253	2.3362092373477625
348	['column50_High', 'column125_Low', 'column147_High']	['column150_Low', 'column50_High', 'column177_Low']	0.05326808054824223	0.05009710504975299	0.02546778279189734	0.47810588498364315	9.543583097442884	0.022799206164873347	1.820106545789419
349	['column50_High', 'column125_Low', 'column147_High']	['column140_High', 'column150_Low', 'column100_High']	0.05326808054824223	0.051868406521107274	0.030957696195571992	0.5811678565653433	11.204659937429222	0.028194765739096676	2.263750784989151
350	['column50_High', 'column125_Low', 'column147_High']	['column150_Low', 'column100_High', 'column180_Low']	0.05326808054824223	0.05519732230521042	0.031712282206925846	0.5953336760127037	10.785553558573737	0.02877202679632461	2.3347697144288433
351	['column50_High', 'column125_Low', 'column147_High']	['column150_Low', 'column187_Low', 'column100_High']	0.05326808054824223	0.05059688112721517	0.027697918348674376	0.5199721496176263	10.276762876159621	0.02500271960930004	1.9778084086507124
352	['column150_Low', 'column125_Low', 'column50_High']	['column87_High', 'column150_Low', 'column50_High']	0.09730338249470556	0.05350528781846066	0.04315094398398541	0.4434680776522165	8.288303749656851	0.037944698497896424	1.7007015665672156
353	['column150_Low', 'column125_Low', 'column50_High']	['column100_High', 'column150_Low', 'column50_High']	0.09730338249470556	0.08720371890674589	0.07762544518156768	0.7977671812774999	9.14831604980767	0.0691402283658238	4.513591250220249
354	['column150_Low', 'column125_Low', 'column50_High']	['column50_High', 'column100_High', 'column177_Low']	0.09730338249470556	0.05873188215012048	0.045756873082757395	0.47024956285817815	8.00671706137743	0.04004206228927025	1.7768142352620437
355	['column150_Low', 'column125_Low', 'column50_High']	['column50_High', 'column100_High', 'column180_Low']	0.09730338249470556	0.054614795857316024	0.045575556770998615	0.46838615064053357	8.576176900197826	0.04026135239982393	1.7783306535030352
356	['column150_Low', 'column125_Low', 'column50_High']	['column150_Low', 'column50_High', 'column177_Low']	0.09730338249470556	0.05009710504975299	0.044500827743637256	0.45734101531422733	9.129090690171173	0.039626209969103696	1.7504600895906837
357	['column150_Low', 'column125_Low', 'column50_High']	['column150_Low', 'column100_High', 'column180_Low']	0.09730338249470556	0.05519732230521042	0.04596022581703787	0.4723394463654811	8.557289133587084	0.04058933965209044	1.7905501390752088
358	['column173_High', 'column50_High', 'column125_Low']	['column87_High', 'column50_High', 'column100_High']	0.05120584449268916	0.05588716730106236	0.024775406965559722	0.48383943690445325	8.657433544592195	0.02191365736760462	1.8291068713906613
359	['column173_High', 'column50_High', 'column125_Low']	['column87_High', 'column150_Low', 'column50_High']	0.05120584449268916	0.05350528781846066	0.024775406965559722	0.48383943690445325	9.0428340194353	0.02203562351799105	1.8337214809770988
360	['column173_High', 'column50_High', 'column125_Low']	['column140_High', 'column50_High', 'column100_High']	0.05120584449268916	0.05105107870835333	0.02366595155197559	0.46217285910311395	9.053145806055026	0.021051837954451615	1.7644124833662538
361	['column173_High', 'column50_High', 'column125_Low']	['column100_High', 'column150_Low', 'column50_High']	0.05120584449268916	0.08720371890674589	0.04065768001061176	0.7940046768766132	9.105169903656376	0.03619233994108875	4.431150509890503
362	['column173_High', 'column50_High', 'column125_Low']	['column150_Low', 'column50_High', 'column177_Low']	0.05120584449268916	0.05009710504975299	0.02193276424777893	0.4283254082629249	8.549903389378322	0.019367499677067364	1.6616146819887474
363	['column173_High', 'column50_High', 'column125_Low']	['column140_High', 'column150_Low', 'column100_High']	0.05120584449268916	0.051868406521107274	0.02366595155197559	0.46217285910311395	8.910488871776653	0.021009985993572188	1.762892798414336
364	['column173_High', 'column50_High', 'column150_Low']	['column87_High', 'column50_High', 'column100_High']	0.05075370633372778	0.05588716730106236	0.025265571556746903	0.49780741904078374	8.907365377083996	0.02242909067972487	1.8799816414962338
365	['column173_High', 'column50_High', 'column150_Low']	['column87_High', 'column150_Low', 'column50_High']	0.05075370633372778	0.05350528781846066	0.024775406965559722	0.4881497087651216	9.123391886450104	0.022059815300319988	1.8491631799174086
366	['column173_High', 'column50_High', 'column150_Low']	['column140_High', 'column50_High', 'column100_High']	0.05075370633372778	0.05105107870835333	0.02366595155197559	0.466290114782192	9.133795535370234	0.021074920095191803	1.778023880716354
367	['column173_High', 'column50_High', 'column150_Low']	['column100_High', 'column150_Low', 'column50_High']	0.05075370633372778	0.08720371890674589	0.04065768001061176	0.8010780482369064	9.186283088380268	0.036231768070009836	4.588715689761331
368	['column173_High', 'column50_High', 'column150_Low']	['column50_High', 'column100_High', 'column180_Low']	0.05075370633372778	0.054614795857316024	0.022434315667332623	0.44202319964215425	8.093469776889082	0.019662412356913912	1.6943091604102225
369	['column173_High', 'column50_High', 'column150_Low']	['column150_Low', 'column50_High', 'column177_Low']	0.05075370633372778	0.05009710504975299	0.02193276424777893	0.4321411347490847	8.62606999585928	0.019390150489913854	1.672779898453326
370	['column173_High', 'column50_High', 'column150_Low']	['column140_High', 'column150_Low', 'column100_High']	0.05075370633372778	0.051868406521107274	0.02366595155197559	0.466290114782192	8.989867745261085	0.021033437679404902	1.7764924722950532
371	['column161_High', 'column52_High', 'column188_Low']	['column177_Low', 'column93_Low', 'column44_Low']	0.05279925177446456	0.05022389316255507	0.02169481443782035	0.41089245981157385	8.181214834972588	0.019043030457636795	1.6122287393124504
372	['column115_High', 'column87_High', 'column54_High']	['column188_High', 'column122_Low', 'column38_Low']	0.05226165361122249	0.05035818720415443	0.021398501543078007	0.40944937759265554	8.130741004093908	0.01876669940692539	1.60806165765212
373	['column192_Low', 'column55_High', 'column171_High']	['column121_Low', 'column176_Low', 'column91_Low']	0.05184848953742867	0.05053957792975903	0.021787949486054125	0.4202234178938949	8.314739360861507	0.019167548708536954	1.6376315487272988
374	['column56_Low', 'column71_High', 'column139_High']	['column166_Low', 'column54_Low', 'column63_Low']	0.05257159983265212	0.0540978332569515	0.024147565758844903	0.459327200155832	8.490676474492794	0.021303556117046908	1.7494909435349348
375	['column56_Low', 'column139_High', 'column99_High']	['column131_High', 'column148_High', 'column23_High']	0.0502439856265139	0.0504081989125951	0.020425653125860452	0.4065293163184446	8.064745916102714	0.01789294430423757	1.6000652217505946
376	['column58_Low', 'column118_High', 'column107_High']	['column43_High', 'column138_Low', 'column29_High']	0.05143109663884177	0.05021118630183926	0.021064798549082678	0.40957319454032665	8.157010911437553	0.018482382174041894	1.6086478542563938
377	['column61_Low', 'column71_High', 'column186_High']	['column183_High', 'column162_High', 'column45_Low']	0.05090726436763992	0.050888347748506	0.021778146129860235	0.4278003620973177	8.40664672807887	0.019187559557794647	1.6587071878100619
378	['column102_Low', 'column198_Low', 'column67_Low']	['column86_High', 'column50_Low', 'column150_High']	0.051009159266544674	0.050463763807624906	0.02159092328988073	0.4232754195586506	8.387710064041936	0.019016809124628296	1.6464292807941783
379	['column99_High', 'column71_High', 'column178_High']	['column160_Low', 'column125_Low', 'column145_High']	0.05009169285405683	0.05130465056466282	0.021337029418037372	0.4259594396261121	8.302550254956826	0.01876709261996757	1.6526625728631905
380	['column99_High', 'column71_High', 'column185_High']	['column34_Low', 'column180_High', 'column114_Low']	0.05611630347070813	0.05028106692967418	0.02295803507944588	0.40911524208699224	8.136566446754262	0.020136447468789294	1.607282842131032
381	['column123_Low', 'column169_Low', 'column73_Low']	['column177_Low', 'column93_Low', 'column44_Low']	0.05054170057686083	0.05022389316255507	0.020682708736522438	0.40922067323534944	8.147928156641749	0.01814430776649633	1.6076664565072167
382	['column75_High', 'column100_High', 'column91_Low']	['column87_High', 'column50_High', 'column100_High']	0.050123716351656605	0.05588716730106236	0.029317671897429894	0.5849061887539178	10.465840675070309	0.026516399375933867	2.2744565375831014
383	['column75_High', 'column100_High', 'column91_Low']	['column150_Low', 'column50_High', 'column87_High']	0.050123716351656605	0.05350528781846066	0.029317671897429894	0.5849061887539178	10.931745489127348	0.026635788027503625	2.2801947090953467
384	['column75_High', 'column100_High', 'column91_Low']	['column50_High', 'column140_High', 'column100_High']	0.050123716351656605	0.05105107870835333	0.029685152988692644	0.5922376700966935	11.600884547025007	0.027126283200069046	2.327210857159544
385	['column75_High', 'column100_High', 'column91_Low']	['column150_Low', 'column50_High', 'column100_High']	0.050123716351656605	0.08720371890674589	0.045466423790109955	0.9070840532080234	10.401896439508997	0.04109544931881863	9.823892589039145
386	['column75_High', 'column100_High', 'column91_Low']	['column50_High', 'column177_Low', 'column100_High']	0.050123716351656605	0.05873188215012048	0.02613536228066181	0.5214170892138573	8.87792235026794	0.023191502078970246	1.9667817145909128
387	['column75_High', 'column100_High', 'column91_Low']	['column50_High', 'column180_Low', 'column100_High']	0.050123716351656605	0.054614795857316024	0.03464149365747679	0.691119816703932	12.654442918902749	0.031903997121321054	3.060685842822467
388	['column75_High', 'column100_High', 'column91_Low']	['column150_Low', 'column50_High', 'column177_Low']	0.050123716351656605	0.05009710504975299	0.02613536228066181	0.5214170892138573	10.408128148243733	0.023624309197108846	1.9848240995272735
389	['column75_High', 'column100_High', 'column91_Low']	['column150_Low', 'column140_High', 'column100_High']	0.050123716351656605	0.051868406521107274	0.029685152988692644	0.5922376700966935	11.418081059723493	0.027085315692616248	2.3252064350910615
390	['column75_High', 'column100_High', 'column91_Low']	['column150_Low', 'column180_Low', 'column100_High']	0.050123716351656605	0.05519732230521042	0.03472184168129182	0.6927228108484866	12.549935067830205	0.031955146754694484	3.0747569655387688
391	['column75_High', 'column125_Low', 'column91_Low']	['column87_High', 'column50_High', 'column100_High']	0.055754110923953146	0.05588716730106236	0.030222801835433064	0.5420730657270459	9.69941923889103	0.027106862510504107	2.061710639925332
392	['column75_High', 'column125_Low', 'column91_Low']	['column150_Low', 'column50_High', 'column87_High']	0.055754110923953146	0.05350528781846066	0.03077830413491307	0.5520364978448622	10.317419461752635	0.027795164382864574	2.112883544369093
393	['column75_High', 'column125_Low', 'column91_Low']	['column50_High', 'column140_High', 'column100_High']	0.055754110923953146	0.05105107870835333	0.03078101141421728	0.5520850553280566	10.814366107365341	0.027934703909124284	2.118591783059761
394	['column75_High', 'column125_Low', 'column91_Low']	['column150_Low', 'column50_High', 'column100_High']	0.055754110923953146	0.08720371890674589	0.04837936144030939	0.8677272516514041	9.950576220027225	0.04351739562340145	6.90086425578488
395	['column75_High', 'column125_Low', 'column91_Low']	['column50_High', 'column177_Low', 'column100_High']	0.055754110923953146	0.05873188215012048	0.028641017406990713	0.5137023428829519	8.746567010570393	0.02536647353482035	1.9355802029359224
396	['column75_High', 'column125_Low', 'column91_Low']	['column50_High', 'column180_Low', 'column100_High']	0.055754110923953146	0.054614795857316024	0.03493205007205003	0.6265376578185643	11.471939938316831	0.03188705068573218	2.531407045274183
397	['column75_High', 'column125_Low', 'column91_Low']	['column150_Low', 'column50_High', 'column177_Low']	0.055754110923953146	0.05009710504975299	0.02868687928317627	0.5145249167779623	10.270551886520622	0.025893759731263406	1.9566460314417369
398	['column75_High', 'column125_Low', 'column91_Low']	['column150_Low', 'column140_High', 'column100_High']	0.055754110923953146	0.051868406521107274	0.030283164000084635	0.5431557153048305	10.471802620036135	0.027391287109458123	2.0753933566478477
399	['column75_High', 'column125_Low', 'column91_Low']	['column150_Low', 'column180_Low', 'column100_High']	0.055754110923953146	0.05519732230521042	0.035012398095865066	0.6279787717110381	11.37697890920624	0.03193492046535517	2.539647218628417
400	['column75_High', 'column125_Low', 'column91_Low']	['column150_Low', 'column187_Low', 'column100_High']	0.055754110923953146	0.05059688112721517	0.023128190142508644	0.4148248399845308	8.198624712490506	0.02030720601973582	1.622425529558854
401	['column150_Low', 'column75_High', 'column91_Low']	['column87_High', 'column50_High', 'column100_High']	0.05246274720252492	0.05588716730106236	0.028975556319248644	0.5523072630450072	9.882541730371589	0.026043561989267792	2.1088410750649516
402	['column150_Low', 'column75_High', 'column91_Low']	['column150_Low', 'column50_High', 'column87_High']	0.05246274720252492	0.05350528781846066	0.02879817037873045	0.5489260840184225	10.259286631274401	0.025991135989912213	2.0983139983208328
403	['column150_Low', 'column75_High', 'column91_Low']	['column50_High', 'column140_High', 'column100_High']	0.05246274720252492	0.05105107870835333	0.030119366970383168	0.5741096030314934	11.245787896300683	0.027441087133690624	2.228152895783228
404	['column150_Low', 'column75_High', 'column91_Low']	['column150_Low', 'column50_High', 'column100_High']	0.05246274720252492	0.08720371890674589	0.04628628250902958	0.8822695146014374	10.117338178488934	0.04171133584890493	7.75327034457635
405	['column150_Low', 'column75_High', 'column91_Low']	['column50_High', 'column177_Low', 'column100_High']	0.05246274720252492	0.05873188215012048	0.028641017406990713	0.545930568531346	9.295301777251593	0.025559781521020456	2.072960769029127
406	['column150_Low', 'column75_High', 'column91_Low']	['column50_High', 'column180_Low', 'column100_High']	0.05246274720252492	0.054614795857316024	0.03408621665695464	0.6497222977166957	11.896452005682283	0.031220974428374765	2.6989591343672146
407	['column150_Low', 'column75_High', 'column91_Low']	['column150_Low', 'column50_High', 'column177_Low']	0.05246274720252492	0.05009710504975299	0.029007340756790723	0.5529131107986405	11.036827582143227	0.026379108998987197	2.1246494090826014
408	['column150_Low', 'column75_High', 'column91_Low']	['column150_Low', 'column140_High', 'column100_High']	0.05246274720252492	0.051868406521107274	0.029621519556250524	0.5646200615820002	10.885625748927419	0.02690036045713588	2.1777107988117956
409	['column150_Low', 'column75_High', 'column91_Low']	['column150_Low', 'column180_Low', 'column100_High']	0.05246274720252492	0.05519732230521042	0.034809559148524356	0.6635100333984997	12.020692412027872	0.03191375598216981	2.8078182753475804
410	['column150_Low', 'column75_High', 'column91_Low']	['column150_Low', 'column187_Low', 'column100_High']	0.05246274720252492	0.05059688112721517	0.023400467645488473	0.4460396927967634	8.815557063197053	0.02074601626167518	1.7138468343806235
411	['column75_High', 'column125_Low', 'column100_High']	['column87_High', 'column50_High', 'column100_High']	0.08828563506405589	0.05588716730106236	0.041515229414534394	0.47023764833784004	8.414054085165652	0.036581195357428965	1.7821440684426313
412	['column75_High', 'column125_Low', 'column100_High']	['column150_Low', 'column50_High', 'column87_High']	0.08828563506405589	0.05350528781846066	0.04331694247481619	0.49064541976038867	9.17003607989384	0.038593194160478295	1.8582236204419482
413	['column75_High', 'column125_Low', 'column100_High']	['column50_High', 'column140_High', 'column100_High']	0.08828563506405589	0.05105107870835333	0.03817341632182478	0.4323853625125758	8.469661630123909	0.033666339417352704	1.6718189747400076
414	['column75_High', 'column125_Low', 'column100_High']	['column150_Low', 'column50_High', 'column100_High']	0.08828563506405589	0.08720371890674589	0.07764888100983558	0.8795188589117269	10.085795307104606	0.0699500453062061	7.576258598218904
415	['column75_High', 'column125_Low', 'column100_High']	['column50_High', 'column180_Low', 'column100_High']	0.08828563506405589	0.054614795857316024	0.04613083377152076	0.522518003501367	9.567334186627233	0.041309131835363846	1.979938952830006
416	['column75_High', 'column125_Low', 'column100_High']	['column150_Low', 'column50_High', 'column177_Low']	0.08828563506405589	0.05009710504975299	0.040946420253219935	0.4637948203409439	9.257916597782144	0.03652356551903177	1.7715287561269717
417	['column75_High', 'column125_Low', 'column100_High']	['column150_Low', 'column140_High', 'column100_High']	0.08828563506405589	0.051868406521107274	0.03817341632182478	0.4323853625125758	8.336199075956216	0.0335941811123482	1.6703790403923455
418	['column75_High', 'column125_Low', 'column100_High']	['column150_Low', 'column180_Low', 'column100_High']	0.08828563506405589	0.05519732230521042	0.04659585084137504	0.5277851918669135	9.561789772129808	0.041722720187824164	2.0007900248407955
419	['column150_Low', 'column75_High', 'column100_High']	['column87_High', 'column50_High', 'column100_High']	0.08444443835265057	0.05588716730106236	0.04026798389834998	0.4768577384597648	8.532508650705942	0.03554862344449115	1.8046961641357
420	['column150_Low', 'column75_High', 'column100_High']	['column150_Low', 'column50_High', 'column87_High']	0.08444443835265057	0.05350528781846066	0.04206969695863177	0.4981938157128055	9.311113649236669	0.03755147297990494	1.8861758619535867
421	['column150_Low', 'column75_High', 'column100_High']	['column50_High', 'column140_High', 'column100_High']	0.08444443835265057	0.05105107870835333	0.037511771877990666	0.44421838323249657	8.701449498653012	0.03320079220916681	1.7074132944714047
422	['column150_Low', 'column75_High', 'column100_High']	['column150_Low', 'column50_High', 'column100_High']	0.08444443835265057	0.08720371890674589	0.07555580207855578	0.8947398260028122	10.260340238007867	0.0681919330132132	8.671810490429563
423	['column150_Low', 'column75_High', 'column100_High']	['column50_High', 'column177_Low', 'column100_High']	0.08444443835265057	0.05873188215012048	0.04133474793591826	0.4894904713949208	8.33432291755555	0.03637516713435727	1.8437816830212925
424	['column150_Low', 'column75_High', 'column100_High']	['column50_High', 'column180_Low', 'column100_High']	0.08444443835265057	0.054614795857316024	0.045285000356425374	0.5362697797492539	9.819129987234346	0.040673084594509655	2.0386534300729844
425	['column150_Low', 'column75_High', 'column100_High']	['column150_Low', 'column50_High', 'column177_Low']	0.08444443835265057	0.05009710504975299	0.040946420253219935	0.48489185376806637	9.679039403304946	0.03671599835419981	1.8440843964493272
426	['column150_Low', 'column75_High', 'column100_High']	['column150_Low', 'column140_High', 'column100_High']	0.08444443835265057	0.051868406521107274	0.037511771877990666	0.44421838323249657	8.564334496216436	0.0331317734210688	1.7059427028071688
427	['column150_Low', 'column75_High', 'column100_High']	['column150_Low', 'column180_Low', 'column100_High']	0.08444443835265057	0.05519732230521042	0.04566966940246462	0.5408250714125464	9.798030933857358	0.041008562521830896	2.0576094618259284
428	['column150_Low', 'column75_High', 'column125_Low']	['column87_High', 'column50_High', 'column100_High']	0.09358730575652614	0.05588716730106236	0.043399239584355806	0.4637299816842888	8.29761113470272	0.038168910170285154	1.7605176505376112
429	['column150_Low', 'column75_High', 'column125_Low']	['column150_Low', 'column50_High', 'column87_High']	0.09358730575652614	0.05350528781846066	0.042667707970023755	0.45591341288343906	8.520903848425567	0.037660292239366545	1.7396030973628274
430	['column150_Low', 'column75_High', 'column125_Low']	['column50_High', 'column140_High', 'column100_High']	0.09358730575652614	0.05105107870835333	0.040643027563996494	0.43427927789407833	8.506760070145562	0.03586529465171735	1.6774158771471905
431	['column150_Low', 'column75_High', 'column125_Low']	['column150_Low', 'column50_High', 'column100_High']	0.09358730575652614	0.08720371890674589	0.07922498456640342	0.8465355843506459	9.70756287648599	0.07106382346197164	5.947934426563569
432	['column150_Low', 'column75_High', 'column125_Low']	['column50_High', 'column177_Low', 'column100_High']	0.09358730575652614	0.05873188215012048	0.04557624747208644	0.4869917677794487	8.291778672011276	0.040079688859646856	1.8348011956369767
433	['column150_Low', 'column75_High', 'column125_Low']	['column50_High', 'column180_Low', 'column100_High']	0.09358730575652614	0.054614795857316024	0.045575556770998615	0.4869843874933913	8.9167116684948	0.040464305172269725	1.842800065135455
434	['column150_Low', 'column75_High', 'column125_Low']	['column150_Low', 'column50_High', 'column177_Low']	0.09358730575652614	0.05009710504975299	0.044063453605861155	0.4708272478801268	9.398292524339155	0.039375000518053115	1.7950714414998186
435	['column150_Low', 'column75_High', 'column125_Low']	['column150_Low', 'column180_Low', 'column100_High']	0.09358730575652614	0.05519732230521042	0.04596022581703787	0.4910946569677578	8.897073924207376	0.04079445713751862	1.8565391199575805
436	['column75_High', 'column125_Low', 'column173_High']	['column87_High', 'column50_High', 'column100_High']	0.0547744367451358	0.05588716730106236	0.024775406965559722	0.4523169645876802	8.093395790684173	0.02171421885536286	1.7238307043565229
437	['column75_High', 'column125_Low', 'column173_High']	['column150_Low', 'column50_High', 'column87_High']	0.0547744367451358	0.05350528781846066	0.024775406965559722	0.4523169645876802	8.45368715933941	0.021844684962417163	1.7281797152416392
438	['column75_High', 'column125_Low', 'column173_High']	['column50_High', 'column140_High', 'column100_High']	0.0547744367451358	0.05105107870835333	0.02366595155197559	0.43206197924211837	8.463327125963774	0.020869657470493942	1.670867042895503
439	['column75_High', 'column125_Low', 'column173_High']	['column150_Low', 'column50_High', 'column100_High']	0.0547744367451358	0.08720371890674589	0.04300617977263084	0.7851505616157699	9.003636214820105	0.03822964518743269	4.248539293180918
440	['column75_High', 'column125_Low', 'column173_High']	['column150_Low', 'column50_High', 'column177_Low']	0.0547744367451358	0.05009710504975299	0.02250912198423852	0.4109420985737005	8.202911089684347	0.019765081272576403	1.612579837483251
441	['column75_High', 'column125_Low', 'column173_High']	['column150_Low', 'column140_High', 'column100_High']	0.0547744367451358	0.051868406521107274	0.02366595155197559	0.43206197924211837	8.32996438913726	0.02082488879991421	1.6694279284448397
442	['column83_High', 'column160_Low', 'column185_Low']	['column113_High', 'column173_Low', 'column107_High']	0.05029660326142618	0.050127162998033416	0.020995863161772474	0.41744097613595244	8.327640168910605	0.018474637131839545	1.6305177640225506
443	['column115_High', 'column123_High', 'column84_Low']	['column122_Low', 'column52_High', 'column111_High']	0.05323616869304037	0.0509592392164673	0.02206563037108201	0.41448569483488545	8.133671169504938	0.01935275571568516	1.6208669069424426
444	['column150_Low', 'column125_Low', 'column91_Low']	['column100_High', 'column87_High', 'column50_High']	0.05060104849505211	0.05588716730106236	0.028975556319248644	0.5726275873924221	10.246137262740405	0.0261476070563965	2.2091103797236475
445	['column150_Low', 'column125_Low', 'column91_Low']	['column150_Low', 'column87_High', 'column50_High']	0.05060104849505211	0.05350528781846066	0.028477708905116	0.5627889095598605	10.518379257567217	0.025770285241472353	2.164846072931739
446	['column150_Low', 'column125_Low', 'column91_Low']	['column100_High', 'column140_High', 'column50_High']	0.05060104849505211	0.05105107870835333	0.030119366970383168	0.5952320725790555	11.65953957563799	0.027536128860937058	2.344427156909527
447	['column150_Low', 'column125_Low', 'column91_Low']	['column150_Low', 'column100_High', 'column50_High']	0.05060104849505211	0.08720371890674589	0.04628628250902958	0.9147297118468911	10.489572271855595	0.04187368289968044	10.704740195720499
448	['column150_Low', 'column125_Low', 'column91_Low']	['column100_High', 'column50_High', 'column177_Low']	0.05060104849505211	0.05873188215012048	0.028641017406990713	0.5660162834331643	9.63729175214255	0.025669122590106782	2.168901924007832
449	['column150_Low', 'column125_Low', 'column91_Low']	['column100_High', 'column180_Low', 'column50_High']	0.05060104849505211	0.054614795857316024	0.03408621665695464	0.6736266870100067	12.33414272516721	0.03132265072323122	2.8966375819204
450	['column150_Low', 'column125_Low', 'column91_Low']	['column150_Low', 'column50_High', 'column177_Low']	0.05060104849505211	0.05009710504975299	0.02868687928317627	0.5669226258420581	11.316474779910529	0.026151913241092	2.1933791780214786
451	['column150_Low', 'column125_Low', 'column91_Low']	['column150_Low', 'column100_High', 'column140_High']	0.05060104849505211	0.051868406521107274	0.029621519556250524	0.5853933947464939	11.28612644979318	0.026996923802514897	2.2868222104159903
452	['column150_Low', 'column125_Low', 'column91_Low']	['column150_Low', 'column100_High', 'column180_Low']	0.05060104849505211	0.05519732230521042	0.03408621665695464	0.6736266870100067	12.203974013181774	0.03129317427419166	2.894852734861191
453	['column150_Low', 'column125_Low', 'column91_Low']	['column150_Low', 'column100_High', 'column187_Low']	0.05060104849505211	0.05059688112721517	0.023128190142508644	0.4570693855240998	9.033548616858328	0.020567934906892044	1.7486638136795052
454	['column92_High', 'column125_Low', 'column100_High']	['column87_High', 'column50_High', 'column100_High']	0.054265300544392846	0.05588716730106236	0.026929493492701927	0.4962562304556242	8.87960965676267	0.023896759562535015	1.8741925752309851
455	['column92_High', 'column125_Low', 'column100_High']	['column87_High', 'column50_High', 'column150_Low']	0.054265300544392846	0.05350528781846066	0.024923692079481707	0.45929335743920496	8.584074138570232	0.022020211555298697	1.7504773155715745
456	['column92_High', 'column125_Low', 'column100_High']	['column140_High', 'column50_High', 'column100_High']	0.054265300544392846	0.05105107870835333	0.02328006736687744	0.42900467026498273	8.403439870797207	0.02050976523765319	1.661920635554107
457	['column92_High', 'column125_Low', 'column100_High']	['column100_High', 'column50_High', 'column150_Low']	0.054265300544392846	0.08720371890674589	0.03801320801219893	0.7005067258606896	8.032991421040187	0.03328107199713561	3.0478022710742536
458	['column92_High', 'column125_Low', 'column100_High']	['column177_Low', 'column50_High', 'column100_High']	0.054265300544392846	0.05873188215012048	0.031006169237328872	0.5713811390754878	9.728636613671263	0.027819066000914723	2.1960492261577227
459	['column92_High', 'column125_Low', 'column100_High']	['column50_High', 'column180_Low', 'column100_High']	0.054265300544392846	0.054614795857316024	0.025197942408296266	0.4643472376547988	8.502224175073911	0.02223425409692835	1.7649217377384323
460	['column92_High', 'column125_Low', 'column100_High']	['column177_Low', 'column50_High', 'column150_Low']	0.054265300544392846	0.05009710504975299	0.029000367824108652	0.5344182660590685	10.667647672022587	0.026281833362179784	2.040249489407077
461	['column92_High', 'column128_Low', 'column188_High']	['column60_Low', 'column19_High', 'column187_Low']	0.053337509756318034	0.050068941044111547	0.021584324089157912	0.4046743874577153	8.08234364495927	0.0189137714577291	1.5956495721715933
462	['column166_Low', 'column148_Low', 'column96_High']	['column61_Low', 'column162_High', 'column27_High']	0.051229004627037875	0.054016944393161875	0.022483644781873497	0.4388850602419665	8.124951627169898	0.01971641048761776	1.6858988926845704
463	['column111_Low', 'column97_Low', 'column144_Low']	['column166_High', 'column53_High', 'column177_High']	0.050564135466769786	0.050271052297660324	0.021000248546213088	0.41531904683734244	8.261594453567305	0.018458336247777124	1.6243541756663418
464	['column105_High', 'column135_Low', 'column99_High']	['column57_Low', 'column67_Low', 'column40_High']	0.050790183468366334	0.05049073186424933	0.022075968534486224	0.4346503010416532	8.608516553300616	0.01951153499964891	1.6795078689972158
465	['column167_High', 'column114_Low', 'column99_High']	['column34_Low', 'column180_High', 'column114_Low']	0.05273630586856454	0.05028106692967418	0.024682142628659136	0.46802941962174593	9.308263491631099	0.02203050490365807	1.7852846907342783
466	['column100_High', 'column109_Low', 'column101_High']	['column140_High', 'column100_High', 'column50_High']	0.05425224307958386	0.05105107870835333	0.022262489572281576	0.4103515045382404	8.038057469510353	0.019492854040721024	1.6093468033841338
467	['column100_High', 'column109_Low', 'column101_High']	['column100_High', 'column150_Low', 'column140_High']	0.05425224307958386	0.051868406521107274	0.02316838863730779	0.4270494144052542	8.233324349986946	0.020354411238574007	1.654822627495343
468	['column125_Low', 'column100_High', 'column150_Low']	['column87_High', 'column150_Low', 'column50_High']	0.09422771795806811	0.05350528781846066	0.042552932972593424	0.45159676892026324	8.440226888461874	0.037511251802770255	1.7259101670827335
469	['column125_Low', 'column100_High', 'column150_Low']	['column100_High', 'column150_Low', 'column50_High']	0.09422771795806811	0.08720371890674589	0.07630476245573911	0.8097910477859092	9.28619854678314	0.06808775502569961	4.798913355381143
470	['column125_Low', 'column100_High', 'column150_Low']	['column180_Low', 'column100_High', 'column50_High']	0.09422771795806811	0.054614795857316024	0.045285000356425374	0.48059107593561234	8.799649772401995	0.04013877277604473	1.8201173686909755
471	['column125_Low', 'column100_High', 'column150_Low']	['column150_Low', 'column177_Low', 'column50_High']	0.09422771795806811	0.05009710504975299	0.041429656267181605	0.43967589542620616	8.776473111361433	0.036709120382037774	1.6952740158711952
472	['column125_Low', 'column100_High', 'column150_Low']	['column100_High', 'column150_Low', 'column180_Low']	0.09422771795806811	0.05519732230521042	0.04566966940246462	0.484673410246313	8.78074134767515	0.04046855168424867	1.833405643101749
473	['column120_Low', 'column100_Low', 'column112_High']	['column179_High', 'column21_Low', 'column24_High']	0.05159429701454474	0.05099164466385047	0.022161465628045635	0.42953324127661213	8.423600456666998	0.01953058756799881	1.6635646877302308
474	['column100_Low', 'column195_Low', 'column112_High']	['column179_High', 'column37_High', 'column24_High']	0.052413246083218554	0.050128270323265695	0.021259732195265377	0.4056175448761649	8.091592673364364	0.01863234682708595	1.5980817089879205
475	['column198_Low', 'column191_Low', 'column103_Low']	['column28_High', 'column150_High', 'column50_Low']	0.050871776120754955	0.05210183408820256	0.021364092180702534	0.41995962810479287	8.060361702312596	0.018713579341486774	1.6341934317686582
476	['column198_Low', 'column191_Low', 'column103_Low']	['column86_High', 'column150_High', 'column50_Low']	0.050871776120754955	0.050463763807624906	0.02462371726210414	0.4840349431412523	9.59173289147561	0.02205653596747199	1.8403111287676275
477	['column198_Low', 'column191_Low', 'column103_Low']	['column195_Low', 'column150_High', 'column50_Low']	0.050871776120754955	0.05264067065588424	0.024230167259432944	0.4762988263259671	9.048114706584306	0.021552242846980405	1.8089692690545318
478	['column104_Low', 'column166_High', 'column116_High']	['column161_High', 'column17_Low', 'column53_High']	0.053224351100907355	0.05006562885833352	0.02134392587595727	0.4010180572327054	8.00984760158376	0.018679215267513608	1.5859148720794032
479	['column125_Low', 'column150_Low', 'column114_High']	['column180_Low', 'column50_High', 'column100_High']	0.051895751521138005	0.054614795857316024	0.023239125025941255	0.44780399829985257	8.199316527150694	0.020404849150752306	1.7120464495069732
480	['column125_Low', 'column150_Low', 'column114_High']	['column150_Low', 'column50_High', 'column177_Low']	0.051895751521138005	0.05009710504975299	0.022801715556581587	0.4393753802234479	8.770474457298294	0.020201888640991258	1.6943652872912527
481	['column125_Low', 'column150_Low', 'column114_High']	['column180_Low', 'column150_Low', 'column100_High']	0.051895751521138005	0.05519732230521042	0.023239125025941255	0.44780399829985257	8.112784816331237	0.020374618502957888	1.7109915225496954
482	['column125_Low', 'column150_Low', 'column114_High']	['column150_Low', 'column187_Low', 'column100_High']	0.051895751521138005	0.05059688112721517	0.026709306954891508	0.5146723223386092	10.172016750292855	0.024083543784168993	1.9562105409845916
483	['column156_Low', 'column117_High', 'column155_High']	['column148_Low', 'column58_Low', 'column178_Low']	0.05233179724003939	0.05039143181596867	0.021194410608838216	0.40500062536782583	8.037093028967757	0.018557336416409675	1.5959824643027143
484	['column123_High', 'column128_Low', 'column165_High']	['column180_High', 'column193_High', 'column78_Low']	0.05373483432328616	0.05220676818527835	0.022720421481480582	0.42282481685506224	8.099042165461862	0.019915099442490442	1.6421240196959679
485	['column147_High', 'column125_Low', 'column150_Low']	['column50_High', 'column140_High', 'column100_High']	0.05156593830511081	0.05105107870835333	0.03143033194227376	0.6095173088154323	11.939361992672232	0.028797835167189454	2.4301945840746915
486	['column147_High', 'column125_Low', 'column150_Low']	['column50_High', 'column100_High', 'column150_Low']	0.05156593830511081	0.08720371890674589	0.04150568153662247	0.8049049993241131	9.230168270516813	0.037008939947500985	4.67872717358704
487	['column147_High', 'column125_Low', 'column150_Low']	['column50_High', 'column100_High', 'column177_Low']	0.05156593830511081	0.05873188215012048	0.02658867703050543	0.5156248078563552	8.779299913093242	0.02356011241900928	1.9432624401844676
488	['column147_High', 'column125_Low', 'column150_Low']	['column50_High', 'column100_High', 'column180_Low']	0.05156593830511081	0.054614795857316024	0.03137429104912041	0.6084305275990844	11.140397360243561	0.028558027855395827	2.414348591441608
489	['column147_High', 'column125_Low', 'column150_Low']	['column50_High', 'column177_Low', 'column150_Low']	0.05156593830511081	0.05009710504975299	0.025513644668082897	0.4947770855466851	9.876360820756142	0.02293034043982268	1.8801658986075596
490	['column147_High', 'column125_Low', 'column150_Low']	['column100_High', 'column140_High', 'column150_Low']	0.05156593830511081	0.051868406521107274	0.030296051751737874	0.5875206143341944	11.327138305186018	0.02762140870108605	2.298615704027152
491	['column147_High', 'column125_Low', 'column150_Low']	['column100_High', 'column180_Low', 'column150_Low']	0.05156593830511081	0.05519732230521042	0.03137429104912041	0.6084305275990844	11.022826872557383	0.02852798933252261	2.4128609206987313
492	['column147_High', 'column125_Low', 'column150_Low']	['column100_High', 'column187_Low', 'column150_Low']	0.05156593830511081	0.05059688112721517	0.027359927190868934	0.5305813893850397	10.486444570585386	0.024750851540231933	2.0225084762383463
493	['column173_High', 'column125_Low', 'column150_Low']	['column50_High', 'column100_High', 'column150_Low']	0.05991787130605044	0.08720371890674589	0.04300617977263084	0.7177521302945241	8.230751386441163	0.03778111856576744	3.234023633360819
494	['column190_Low', 'column195_High', 'column127_Low']	['column166_Low', 'column38_Low', 'column86_Low']	0.05076683698467254	0.05215936087077165	0.021435188641459768	0.4222281693053174	8.094964398651593	0.018787222870908594	1.6405102996966714
495	['column175_High', 'column148_High', 'column131_Low']	['column176_High', 'column78_Low', 'column79_Low']	0.05174146111608863	0.05105688004871583	0.021895942227993962	0.42317982050927394	8.28839952824179	0.01925418465424453	1.6451281589855353
496	['column162_High', 'column131_Low', 'column166_High']	['column87_Low', 'column176_High', 'column65_High']	0.051637640279380566	0.059279781313294845	0.025156917291757033	0.48718177584506017	8.218346374631421	0.022095849268460768	1.8344126132352145
497	['column162_High', 'column131_Low', 'column166_High']	['column99_Low', 'column176_High', 'column78_Low']	0.051637640279380566	0.05194351338104451	0.02175468680114174	0.4212951382642596	8.110640017238433	0.019072446342324172	1.6382383306326458
498	['column148_High', 'column177_Low', 'column197_Low']	['column34_Low', 'column65_Low', 'column58_Low']	0.05118163377406973	0.05038221215752772	0.02246324593964241	0.438892709810741	8.71126318230084	0.019884602008268342	1.6923996612522545
499	['column125_Low', 'column75_High', 'column50_High', 'column91_Low']	['column100_High', 'column87_High', 'column50_High']	0.05109243619824616	0.05588716730106236	0.030146494088563847	0.5900382978723312	10.557670505892954	0.02729108255893361	2.302929341445961
500	['column125_Low', 'column75_High', 'column50_High', 'column91_Low']	['column87_High', 'column150_Low', 'column50_High']	0.05109243619824616	0.05350528781846066	0.03077830413491307	0.6024043170595492	11.258780984478785	0.02804458863077957	2.380545747332219
501	['column125_Low', 'column75_High', 'column50_High', 'column91_Low']	['column100_High', 'column140_High', 'column50_High']	0.05109243619824616	0.05105107870835333	0.030704703667348062	0.6009637815705108	11.771813579174713	0.028096379685589878	2.3781022309866553
502	['column125_Low', 'column75_High', 'column50_High', 'column91_Low']	['column100_High', 'column150_Low', 'column50_High']	0.05109243619824616	0.08720371890674589	0.04837936144030939	0.9468987004767273	10.858466959297045	0.04392391099581668	17.189716434212748
503	['column125_Low', 'column75_High', 'column50_High', 'column91_Low']	['column100_High', 'column177_Low', 'column50_High']	0.05109243619824616	0.05873188215012048	0.028641017406990713	0.5605725531634341	9.544603929610048	0.02564026246543277	2.1420330583036176
504	['column125_Low', 'column75_High', 'column50_High', 'column91_Low']	['column100_High', 'column180_Low', 'column50_High']	0.05109243619824616	0.054614795857316024	0.03493205007205003	0.6837029641042863	12.518639928463628	0.03214164709922988	2.988915787545942
505	['column125_Low', 'column75_High', 'column50_High', 'column91_Low']	['column177_Low', 'column150_Low', 'column50_High']	0.05109243619824616	0.05009710504975299	0.028641017406990713	0.5605725531634341	11.189719497897377	0.026081434263519374	2.161683121499554
506	['column125_Low', 'column75_High', 'column50_High', 'column91_Low']	['column100_High', 'column140_High', 'column150_Low']	0.05109243619824616	0.051868406521107274	0.030283164000084635	0.5927132517733449	11.42725006468334	0.027633080749200265	2.327921538343932
507	['column125_Low', 'column75_High', 'column50_High', 'column91_Low']	['column100_High', 'column180_Low', 'column150_Low']	0.05109243619824616	0.05519732230521042	0.035012398095865066	0.6852755652521993	12.415014653482782	0.03219223242767207	3.001999760367802
508	['column125_Low', 'column75_High', 'column50_High', 'column91_Low']	['column100_High', 'column150_Low', 'column187_Low']	0.05109243619824616	0.05059688112721517	0.023128190142508644	0.4526734652614306	8.946667367169901	0.020543072221686158	1.7346192055648597
509	['column100_High', 'column75_High', 'column125_Low', 'column50_High']	['column100_High', 'column87_High', 'column50_High']	0.08200663644584698	0.05588716730106236	0.041515229414534394	0.5062423142052527	9.05829260370528	0.03693211080368795	1.9120974920710414
510	['column100_High', 'column75_High', 'column125_Low', 'column50_High']	['column87_High', 'column150_Low', 'column50_High']	0.08200663644584698	0.05350528781846066	0.04331694247481619	0.5282126465877003	9.872157839424869	0.03892915378875728	2.0061892404190584
511	['column100_High', 'column75_High', 'column125_Low', 'column50_High']	['column100_High', 'column140_High', 'column50_High']	0.08200663644584698	0.05105107870835333	0.03817341632182478	0.46549179403343244	9.118157849175192	0.03398688907002052	1.7753682931315025
512	['column100_High', 'column75_High', 'column125_Low', 'column50_High']	['column100_High', 'column150_Low', 'column50_High']	0.08200663644584698	0.08720371890674589	0.0753003812478165	0.9182230184204794	10.529631418614278	0.06814909757470516	11.162019720740652
513	['column100_High', 'column75_High', 'column125_Low', 'column50_High']	['column100_High', 'column177_Low', 'column50_High']	0.08200663644584698	0.05873188215012048	0.04108157135373199	0.5009542292453389	8.529510904569424	0.03626516724646673	1.8861358476728223
514	['column100_High', 'column75_High', 'column125_Low', 'column50_High']	['column100_High', 'column180_Low', 'column50_High']	0.08200663644584698	0.054614795857316024	0.04613083377152076	0.5625256170820178	10.299875853269597	0.041652058063085695	2.1610070007686026
515	['column100_High', 'column75_High', 'column125_Low', 'column50_High']	['column177_Low', 'column150_Low', 'column50_High']	0.08200663644584698	0.05009710504975299	0.040946420253219935	0.49930617847323705	9.966767101160048	0.036838125172415435	1.8971731907010825
516	['column100_High', 'column75_High', 'column125_Low', 'column50_High']	['column100_High', 'column140_High', 'column150_Low']	0.08200663644584698	0.051868406521107274	0.03817341632182478	0.46549179403343244	8.974476473342317	0.033919862765222936	1.7738391719624909
517	['column100_High', 'column75_High', 'column125_Low', 'column50_High']	['column100_High', 'column180_Low', 'column150_Low']	0.08200663644584698	0.05519732230521042	0.04659585084137504	0.5681960980334143	10.293906919824963	0.042069304098307406	2.1880364521761577
518	['column100_High', 'column75_High', 'column125_Low', 'column50_High']	['column100_High', 'column150_Low', 'column187_Low']	0.08200663644584698	0.05059688112721517	0.03395492395783213	0.41405092843009406	8.183329074949313	0.02980564392193886	1.6202826575509257
519	['column100_High', 'column75_High', 'column150_Low', 'column50_High']	['column100_High', 'column87_High', 'column50_High']	0.07927197091011288	0.05588716730106236	0.04026798389834998	0.5079725334949747	9.089251755390341	0.03583769799781155	1.9188214011814624
520	['column100_High', 'column75_High', 'column150_Low', 'column50_High']	['column87_High', 'column150_Low', 'column50_High']	0.07927197091011288	0.05350528781846066	0.04206969695863177	0.5307007820751035	9.918660448584644	0.037828227339149534	2.016825675454269
521	['column100_High', 'column75_High', 'column150_Low', 'column50_High']	['column100_High', 'column140_High', 'column50_High']	0.07927197091011288	0.05105107870835333	0.037511771877990666	0.47320347213929576	9.269215932588452	0.0334648522516922	1.8013575851482606
522	['column100_High', 'column75_High', 'column150_Low', 'column50_High']	['column100_High', 'column150_Low', 'column50_High']	0.07927197091011288	0.08720371890674589	0.07320730231653669	0.9234954231117456	10.59009219663344	0.06629449164810747	11.93126369977211
523	['column100_High', 'column75_High', 'column150_Low', 'column50_High']	['column100_High', 'column177_Low', 'column50_High']	0.07927197091011288	0.05873188215012048	0.04108157135373199	0.5182357759253231	8.823755632429704	0.03642577930043146	1.9537941399815861
524	['column100_High', 'column75_High', 'column150_Low', 'column50_High']	['column100_High', 'column180_Low', 'column50_High']	0.07927197091011288	0.054614795857316024	0.045285000356425374	0.5712611889992542	10.459824668972553	0.040955577847962464	2.2050376123775726
525	['column100_High', 'column75_High', 'column150_Low', 'column50_High']	['column177_Low', 'column150_Low', 'column50_High']	0.07927197091011288	0.05009710504975299	0.040946420253219935	0.5165308719225539	10.310593225088976	0.03697512399903505	1.9647643247204063
526	['column100_High', 'column75_High', 'column150_Low', 'column50_High']	['column100_High', 'column140_High', 'column150_Low']	0.07927197091011288	0.051868406521107274	0.037511771877990666	0.47320347213929576	9.123154225814337	0.03340006106509554	1.7998060794538835
527	['column100_High', 'column75_High', 'column150_Low', 'column50_High']	['column100_High', 'column180_Low', 'column150_Low']	0.07927197091011288	0.05519732230521042	0.04566966940246462	0.5761137117966931	10.437348909990696	0.04129406887436986	2.2289059683894226
528	['column100_High', 'column75_High', 'column150_Low', 'column50_High']	['column100_High', 'column150_Low', 'column187_Low']	0.07927197091011288	0.05059688112721517	0.03395492395783213	0.42833454962705403	8.465631479341528	0.02994400946897309	1.6607670067404083
529	['column125_Low', 'column75_High', 'column150_Low', 'column50_High']	['column100_High', 'column87_High', 'column50_High']	0.08528194989219977	0.05588716730106236	0.041287534577005396	0.48412981444719194	8.662629326678884	0.03652136797561921	1.8301364551378823
530	['column125_Low', 'column75_High', 'column150_Low', 'column50_High']	['column87_High', 'column150_Low', 'column50_High']	0.08528194989219977	0.05350528781846066	0.042667707970023755	0.5003134663777935	9.350729372306505	0.03810467269532207	1.8941769459353635
531	['column125_Low', 'column75_High', 'column150_Low', 'column50_High']	['column100_High', 'column140_High', 'column50_High']	0.08528194989219977	0.05105107870835333	0.03853132255664608	0.4518109940655838	8.850175265574856	0.03417758702029755	1.7310615700402723
532	['column125_Low', 'column75_High', 'column150_Low', 'column50_High']	['column100_High', 'column150_Low', 'column50_High']	0.08528194989219977	0.08720371890674589	0.07687648480438433	0.9014391075902893	10.33716358535434	0.06943958161816575	9.261242048203302
533	['column125_Low', 'column75_High', 'column150_Low', 'column50_High']	['column100_High', 'column177_Low', 'column50_High']	0.08528194989219977	0.05873188215012048	0.045078367534796014	0.5285804040805482	8.999888727037227	0.04006959810419486	1.9966673553610772
534	['column125_Low', 'column75_High', 'column150_Low', 'column50_High']	['column100_High', 'column180_Low', 'column50_High']	0.08528194989219977	0.054614795857316024	0.045575556770998615	0.5344103509430562	9.785083740663078	0.04091790048732227	2.030511644873486
535	['column125_Low', 'column75_High', 'column150_Low', 'column50_High']	['column177_Low', 'column150_Low', 'column50_High']	0.08528194989219977	0.05009710504975299	0.04401759172967559	0.5161419478015666	10.302829819986007	0.03974521292707829	1.9631850511411675
536	['column125_Low', 'column75_High', 'column150_Low', 'column50_High']	['column100_High', 'column140_High', 'column150_Low']	0.08528194989219977	0.051868406521107274	0.03810978288938265	0.44686809972749375	8.615419861522943	0.03368634404346133	1.7141148304984504
537	['column125_Low', 'column75_High', 'column150_Low', 'column50_High']	['column100_High', 'column180_Low', 'column150_Low']	0.08528194989219977	0.05519732230521042	0.04596022581703787	0.5389209073565234	9.763533534771693	0.04125289054202131	2.0491119479697293
538	['column125_Low', 'column75_High', 'column150_Low', 'column50_High']	['column100_High', 'column150_Low', 'column187_Low']	0.08528194989219977	0.05059688112721517	0.03739967225819853	0.43854147689485756	8.667361843751547	0.03308467157720577	1.6909586012197615
539	['column100_High', 'column150_Low', 'column125_Low', 'column50_High']	['column100_High', 'column87_High', 'column50_High']	0.08489525665297147	0.05588716730106236	0.04075121991231164	0.4800176301827021	8.589049210471927	0.036006664500680394	1.8156631599464867
540	['column100_High', 'column150_Low', 'column125_Low', 'column50_High']	['column87_High', 'column150_Low', 'column50_High']	0.08489525665297147	0.05350528781846066	0.042552932972593424	0.5012404067112741	9.36805364755619	0.038010587830954096	1.8976972571906503
541	['column100_High', 'column150_Low', 'column125_Low', 'column50_High']	['column100_High', 'column140_High', 'column50_High']	0.08489525665297147	0.05105107870835333	0.037511771877990666	0.44185945548558153	8.65524229193773	0.03317777744863396	1.700197075124207
542	['column100_High', 'column150_Low', 'column125_Low', 'column50_High']	['column100_High', 'column150_Low', 'column50_High']	0.08489525665297147	0.08720371890674589	0.07395626269372003	0.8711471713435411	9.989793809999439	0.06655308059603826	7.084022063084911
543	['column100_High', 'column150_Low', 'column125_Low', 'column50_High']	['column100_High', 'column177_Low', 'column50_High']	0.08489525665297147	0.05873188215012048	0.04156480736769365	0.48960105671862425	8.33620580159834	0.036578749158847096	1.8441811650283366
544	['column100_High', 'column150_Low', 'column125_Low', 'column50_High']	['column100_High', 'column180_Low', 'column50_High']	0.08489525665297147	0.054614795857316024	0.045285000356425374	0.5334220325351985	9.76698757473691	0.040648463245068885	2.0262105587186854
545	['column100_High', 'column150_Low', 'column125_Low', 'column50_High']	['column177_Low', 'column150_Low', 'column50_High']	0.08489525665297147	0.05009710504975299	0.041429656267181605	0.48800908202132753	9.741263123621026	0.03717664967641195	1.8553120018230798
546	['column100_High', 'column150_Low', 'column125_Low', 'column50_High']	['column100_High', 'column140_High', 'column150_Low']	0.08489525665297147	0.051868406521107274	0.037511771877990666	0.44185945548558153	8.518855409714037	0.0331083901942006	1.6987326987752984
547	['column100_High', 'column150_Low', 'column125_Low', 'column50_High']	['column100_High', 'column180_Low', 'column150_Low']	0.08489525665297147	0.05519732230521042	0.04566966940246462	0.5379531342858141	9.74600056341924	0.040983678558806996	2.0448200124340374
548	['column100_High', 'column150_Low', 'column125_Low', 'column50_High']	['column100_High', 'column150_Low', 'column187_Low']	0.08489525665297147	0.05059688112721517	0.03481702094642122	0.41011738840420325	8.105586337882166	0.030521585737286402	1.6094780558192503
549	['column100_High', 'column75_High', 'column150_Low', 'column125_Low']	['column100_High', 'column87_High', 'column50_High']	0.08305698201834273	0.05588716730106236	0.04026798389834998	0.4848235864079072	8.675043123874543	0.03562616444876953	1.83260104265268
550	['column100_High', 'column75_High', 'column150_Low', 'column125_Low']	['column87_High', 'column150_Low', 'column50_High']	0.08305698201834273	0.05350528781846066	0.04206969695863177	0.5065160801212459	9.46665462000347	0.03762570923040763	1.9179849110667826
551	['column100_High', 'column75_High', 'column150_Low', 'column125_Low']	['column100_High', 'column140_High', 'column50_High']	0.08305698201834273	0.05105107870835333	0.037511771877990666	0.45163899489757975	8.846806107226868	0.033271623351693966	1.730518604462778
552	['column100_High', 'column75_High', 'column150_Low', 'column125_Low']	['column100_High', 'column150_Low', 'column50_High']	0.08305698201834273	0.08720371890674589	0.07555580207855578	0.909686341141912	10.431737918364634	0.06831292436538557	10.106957160572502
553	['column100_High', 'column75_High', 'column150_Low', 'column125_Low']	['column100_High', 'column177_Low', 'column50_High']	0.08305698201834273	0.05873188215012048	0.04133474793591826	0.49766734754207276	8.473546723226406	0.036456655056272276	1.8737944134115694
554	['column100_High', 'column75_High', 'column150_Low', 'column125_Low']	['column100_High', 'column180_Low', 'column50_High']	0.08305698201834273	0.054614795857316024	0.045285000356425374	0.5452280983003259	9.983157306396649	0.040748860238968815	2.078811818868715
555	['column100_High', 'column75_High', 'column150_Low', 'column125_Low']	['column177_Low', 'column150_Low', 'column50_High']	0.08305698201834273	0.05009710504975299	0.040946420253219935	0.49299191059190084	9.840726527057706	0.03678550589993158	1.8735458364366542
556	['column100_High', 'column75_High', 'column150_Low', 'column125_Low']	['column100_High', 'column140_High', 'column150_Low']	0.08305698201834273	0.051868406521107274	0.037511771877990666	0.45163899489757975	8.707400616091613	0.03320373857024697	1.7290281122411417
557	['column100_High', 'column75_High', 'column150_Low', 'column125_Low']	['column100_High', 'column180_Low', 'column150_Low']	0.08305698201834273	0.05519732230521042	0.04566966940246462	0.5498594855322181	9.961705796013105	0.04108514639630009	2.0989061133763207
558	['column100_High', 'column75_High', 'column150_Low', 'column125_Low']	['column100_High', 'column150_Low', 'column187_Low']	0.08305698201834273	0.05059688112721517	0.03395492395783213	0.408814805603379	8.079842007958959	0.029752499711864795	1.605931826222019
559	['column75_High', 'column150_Low', 'column50_High', 'column100_High', 'column125_Low']	['column100_High', 'column87_High', 'column50_High']	0.07892239206930217	0.05588716730106236	0.04026798389834998	0.5102225470179673	9.129511686813808	0.03585723496897285	1.9276363722965666
560	['column75_High', 'column150_Low', 'column50_High', 'column100_High', 'column125_Low']	['column87_High', 'column150_Low', 'column50_High']	0.07892239206930217	0.05350528781846066	0.04206969695863177	0.5330514681016022	9.962594162846203	0.03784693165564236	2.0269786657932674
561	['column75_High', 'column150_Low', 'column50_High', 'column100_High', 'column125_Low']	['column100_High', 'column140_High', 'column50_High']	0.07892239206930217	0.05105107870835333	0.037511771877990666	0.4752994795830742	9.310272997332424	0.0334826986286092	1.8085534211736902
562	['column75_High', 'column150_Low', 'column50_High', 'column100_High', 'column125_Low']	['column100_High', 'column150_Low', 'column50_High']	0.07892239206930217	0.08720371890674589	0.07320730231653669	0.9275859537082071	10.636999950657506	0.06632497622307727	12.60523790391625
563	['column75_High', 'column150_Low', 'column50_High', 'column100_High', 'column125_Low']	['column100_High', 'column177_Low', 'column50_High']	0.07892239206930217	0.05873188215012048	0.04108157135373199	0.5205312494539959	8.862839575334945	0.036446310723712134	1.963147998233446
564	['column75_High', 'column150_Low', 'column50_High', 'column100_High', 'column125_Low']	['column100_High', 'column180_Low', 'column50_High']	0.07892239206930217	0.054614795857316024	0.045285000356425374	0.5737915332908355	10.506155416013923	0.040974670024989376	2.2181286341920434
565	['column75_High', 'column150_Low', 'column50_High', 'column100_High', 'column125_Low']	['column177_Low', 'column150_Low', 'column50_High']	0.07892239206930217	0.05009710504975299	0.040946420253219935	0.5188187937494934	10.356262966377765	0.03699263688694631	1.9741063919602053
566	['column75_High', 'column150_Low', 'column50_High', 'column100_High', 'column125_Low']	['column100_High', 'column140_High', 'column150_Low']	0.07892239206930217	0.051868406521107274	0.037511771877990666	0.4752994795830742	9.163564324839175	0.03341819316252189	1.8069957177201001
567	['column75_High', 'column150_Low', 'column50_High', 'column100_High', 'column125_Low']	['column100_High', 'column180_Low', 'column150_Low']	0.07892239206930217	0.05519732230521042	0.04566966940246462	0.5786655498525924	10.48358010290598	0.04131336469031716	2.2424054747107482
568	['column75_High', 'column150_Low', 'column50_High', 'column100_High', 'column125_Low']	['column100_High', 'column150_Low', 'column187_Low']	0.07892239206930217	0.05059688112721517	0.03395492395783213	0.43023181466694693	8.503129147134976	0.02996169706802618	1.6662971771893853
